1 Microbial subnetworks related to short-term diel O<sub>2</sub> fluxes within geochemically distinct  
2 freshwater wetlands

3

4 Dean J. Horton<sup>1</sup>, Matthew J. Cooper<sup>2</sup>, Anthony J. Wing<sup>1</sup>, Peter S. Kourtev<sup>1</sup>, Donald G. Uzarski<sup>1</sup>,  
5 and Deric R. Learman<sup>1\*</sup>

6

7 <sup>1</sup>Institute for Great Lakes Research, CMU Biological Station, and Department of Biology,  
8 Central Michigan University, Mt. Pleasant, MI, U.S.A.

9

10 <sup>2</sup>Mary Griggs Burke Center for Freshwater Innovation, Northland College, Ashland, WI, U.S.A.

11

12

13

14 \*Corresponding author: [deric.learman@cmich.edu](mailto:deric.learman@cmich.edu)

15

16

17

18

19

20

21

22

23

24 **ABSTRACT**

25 O<sub>2</sub> concentrations often fluctuate over diel timescales within wetlands, driven by  
26 temperature, sunlight, photosynthesis, and respiration. These daily fluxes have been shown to  
27 impact biogeochemical transformations (e.g. denitrification), which are mediated by the residing  
28 microbial community. However, little is known about how resident microbial communities  
29 respond to diel dramatic physical and chemical fluxes in freshwater wetland ecosystems. In this  
30 study, total microbial (bacterial and archaeal) community structure was significantly related to  
31 diel time points in just one out of four distinct freshwater wetlands sampled. This suggests that  
32 daily environmental shifts may influence wetlands differentially based upon the resident  
33 microbial community and specific physical and chemical conditions of a freshwater wetland.  
34 However, when exploring at finer resolutions of the microbial communities within each wetland,  
35 subcommunities within two wetlands were found to correspond to fluctuating O<sub>2</sub> levels.  
36 Microbial taxa that were found to be susceptible to fluctuating O<sub>2</sub> levels within these  
37 subnetworks may have intimate ties to metabolism and/or diel redox cycles. This study  
38 highlights that freshwater wetland microbial communities are often stable in community  
39 structure when confronted with short-term O<sub>2</sub> fluxes, however, specialist taxa may be sensitive to  
40 these same fluxes.

41  
42 Key words: wetland microbial ecology, diel cycles, Network analysis, 16S rRNA gene  
43 sequencing

44

45

## 46 INTRODUCTION

47 Diel O<sub>2</sub> fluctuations have been observed within aquatic systems, including freshwater  
48 wetlands, with near anoxic levels occurring at night and elevated O<sub>2</sub> concentrations occurring  
49 during daytime hours (Cornell & Klarer, 2008; Reeder, 2011; Maynard et al., 2012). In aquatic  
50 ecosystems other than wetlands (such as oceans and salt marshes), microbial community activity  
51 and structure can respond to short-term daily changes in environmental conditions (Ghiglione et  
52 al., 2007; Ottesen et al., 2014; Andrade et al., 2015; Morris et al., 2016; Kearns et al., 2017). As  
53 a consequence, geochemical processes can respond daily to diel environmental fluxes (Jørgensen  
54 et al., 1979; Laursen & Seitzinger, 2004; Harrison et al., 2005), as many geochemical  
55 transformations are driven by microbial communities that are sensitive to shifting environmental  
56 variables such as O<sub>2</sub>, pH, temperature, and light levels. Diel O<sub>2</sub> fluxes are of particular interest  
57 within freshwater wetlands, as oxygen availability can influence microbial community  
58 metabolism, and thereby influence important transformations of redox-sensitive elements which  
59 commonly occur within wetlands, including (but not limited to) denitrification, methanogenesis,  
60 and oxidation and reduction of iron, manganese, and sulfate (Firestone & Davidson, 1989;  
61 Ehrlich, 1997; Beck & Bruland, 2000; Venterink et al., 2003; Reddy & DeLaune, 2008).  
62 Furthermore, shifts in microbial metabolic processes can directly control rates of carbon  
63 mineralization (Thomas et al., 1996; Kuehn et al., 2004), and in turn, regulate greenhouse gas  
64 emission and pollution mitigation in freshwater wetlands.

65           While evidence suggests that diel fluxes of O<sub>2</sub> can influence microbial communities in  
66 several aquatic systems, the effects of environmental diel fluxes on microbial community  
67 structure and activity within freshwater wetlands has remained understudied. Specifically,  
68 current research on microbial community response to diel fluxes in freshwater wetlands has been  
69 limited to plant rhizosphere microbial communities. Rhizosphere community structure (i.e., beta  
70 diversity) has been consistently found to be stable throughout diel fluxes, while expression of  
71 functional genes appears to be idiosyncratic in response to diel fluxes based upon the functional  
72 community targeted. Xu et al. (2012) found that microbial communities were stable within rice  
73 plant rhizospheres, while *mcrA* (methyl-coenzyme M reductase) gene expression responded to  
74 diel fluxes, suggesting that methanogen activity may specifically respond to daily O<sub>2</sub>  
75 fluctuations. In another study, both total microbial community structure, ammonium-oxidizer  
76 community structure, and *amoA* expression remained largely stable within wetland plant  
77 rhizospheres (Nikolausz et al., 2008). These studies suggest that subsets of microbial  
78 communities, possibly composed of microorganisms with redox-sensitive metabolisms, may  
79 respond uniquely to environmental diel fluxes. While insights have been gained on microbial  
80 community response to diel fluxes in studies of wetland rhizospheres, it is necessary to examine  
81 the influence of diel fluxes on microbial communities in the water column of freshwater  
82 wetlands. Recent research in a salt marsh has highlighted that active soil microbial communities  
83 remain stable in the face of diel environmental fluxes, while active microbial communities shift  
84 with diel fluxes within the water column (Kearns et al., 2017).

85           In this study, we sought to explore 1.) whether microbial community structure, or  
86 subnetworks of microbial taxa, varied between dawn and dusk time points across four distinct  
87 freshwater wetlands, and 2.) whether existing variability in microbial communities was related to  
88 environmental fluxes (e.g., O<sub>2</sub>, pH, and temperature). Throughout the summers of 2015 and  
89 2016, four geochemically distinct freshwater wetlands within Michigan, U.S.A. were sampled at  
90 dawn and dusk time points for two consecutive days. These wetlands experienced consistent  
91 diurnal environmental fluctuations between dawn and dusk, especially in terms of dissolved  
92 oxygen concentrations. Microbial community structure (16S rRNA gene sequencing) and active  
93 community structure (16S rRNA DGGE profiling) were analyzed with relation to diel fluxes  
94 (samples taken at dusk and dawn) within the water columns of wetlands.

95

## 96 **METHODS**

### 97 **Sampling design**

98           In August of 2015, four wetland sites were selected to explore the presence of diel fluxes  
99 of environmental conditions, as well as the microbial communities that may correspond to  
100 environmental fluctuations. Two of the wetlands, Main Marsh (MM) and North Marsh (NM)  
101 wetlands, were located on Beaver Island, MI, while the other two, Chipp-A-Waters Park oxbow  
102 lake (CW) and Pac Man Pond (PM) wetlands, were located in Mount Pleasant, MI. MM and NM  
103 were both part of the Miller's Marsh system, however, the two branches of the marsh are  
104 separated by a Maple-Beech forest stand (Rowe, 2003). In the summer of 2015, samples were  
105 taken close to shore from two zones, nearshore ("A"; ~ 10 cm water depth), as well as out further

106 into the wetland (“B”; ~ 30 cm water depth) within each site. Three replicate points were  
107 sampled in each zone. The two zones were established to examine whether community response  
108 to environmental diel fluxes was ubiquitous throughout the wetland or dependent upon water  
109 depth. Samples at each location were first taken at sunset, followed by dawn on the subsequent  
110 day. These times were chosen as O<sub>2</sub> levels were likely to be higher at sunset (after  
111 photosynthesis occurred throughout the day) and respectively lower at dawn (where O<sub>2</sub> could be  
112 depleted due to respiration and lack of photosynthesis at night). Collection was repeated in this  
113 fashion for two consecutive days at each location, totaling four sampling times at each wetland.  
114 Physical data were collected at each sampling location using a YSI (Yellow Springs, OH)  
115 hydroLab probe for measurement of O<sub>2</sub> (DO), pH, conductivity (spCond), temperature (Temp),  
116 turbidity (Turbid), oxidation-reduction potential (ORP), and chlorophyll-a (Chl).

117 Water samples (both for DNA and chemical analysis) were collected by submerging one  
118 500 mL bottle underwater to the depth just above the sediment/water interface, where the lid was  
119 opened and sealed once the bottle was filled. Of this water sample, 240 mL were immediately  
120 filtered through two consecutive sterile syringe push filters for DNA collection: a primary 2.7  
121 µm filter, followed by a secondary 0.22 µm filter. The filters were immediately placed in sterile  
122 conical tubes, flash frozen in an ethanol and dry ice bath, and transported to the lab on dry ice.  
123 The first 30 mL of water to pass through the filters were collected into a glass vial, which  
124 contained HCl to reduce pH to 3 or lower for DOC measurements. Leftover unfiltered water for  
125 each sample was retained and transported to the lab on ice, where the water was pre-filtered  
126 through a 1.2 µm filter if needed, and then vacuum filtered through a 0.45 µm filter for nutrient

127 analysis. DNA samples were stored at -80°C, DOC samples were stored at 4°C, and nutrient  
128 analysis samples were stored at -20°C.

129 In August of 2016, additional samples were collected from MM and NM wetlands for  
130 further analysis of RNA, as they experienced more pronounced and consistent diel O<sub>2</sub> fluctuation  
131 regimes than CW and PM wetlands. A similar experimental design was implemented as the  
132 previous year, however, only zone “B” samples were taken (~ 30 cm water depth) as these  
133 locations experienced more dramatic diel fluxes than zone “A” the previous year. Samples were  
134 taken at each wetland first before dawn, and in the evening before sundown for one day in a  
135 similar way as described for DNA collection (as describe above) with the following  
136 modifications: Two 500 mL bottles were submerged underwater and opened above the sediment-  
137 water interface at each sampling point. For each water sample, 120 mL of water were filtered  
138 through each syringe filter system for a total of 4 filters, and a total of 460 mL of water were  
139 filtered for each sample unless filters became clogged before 120 mL of filtrate were able to be  
140 collected. One control sample was filtered in the field using sterile nanopure water at each  
141 wetland location. Filters were flash frozen in an ethanol and dry ice bath in the same manner as  
142 DNA preservation methods described above, as previous studies indicate that the use of RNA  
143 preservatives can result in a biased interpretation of bacterial community composition from  
144 freshwater samples (McCarthy et al., 2015). Filters were transported on dry ice and stored at -  
145 80°C.

146

147 **Chemical analysis**

148 DOC analysis was accomplished for the 2015 water samples using a Shimadzu (Kyoto,  
149 Japan) TOC-VCPH Total Organic Carbon Analyzer. For both 2015 and 2016 water samples,  
150 total N (TN), total P (TP),  $\text{NH}_3$ ,  $\text{NO}_3^-$ , and soluble reactive phosphorous (SRP) values for each  
151 sample were obtained through use of a Seal Analytical (Mequon, Wisconsin, USA) Quattro  
152 Bran+Luebbe Analyzer with a XY-2 sampler. Supplemental Table 1 contains raw chemical and  
153 physical data.

154

## 155 **Microbial community analysis**

### 156 *Microbial community rRNA gene sequencing*

157 DNA was extracted from filters from the 2015 sampling effort using MoBio PowerSoil  
158 DNA extraction kits (Mo Bio, Carlsbad, CA). The quantity of the extracted environmental DNA  
159 for library preparation was assessed using a Qubit<sup>®</sup> 2.0 fluorometer (Life Technologies,  
160 Carlsbad, CA). DNA samples were sent to Michigan State University for sequence library  
161 preparation and sequencing at the Research Technology Support Facility (Lansing, MI). The V4  
162 region of the 16S rRNA gene was targeted in PCR with previously developed and commonly  
163 used primers 16Sf-V4 (515f) and 16Sr-V4 (806r) and protocol (Caporaso et al., 2012; Kozich et  
164 al., 2013). Generated amplicons were sequenced on a MiSeq high-throughput sequencer  
165 (Illumina, San Diego, CA) using paired-end 250 bp sequencing format.

166 Sequence data were quality filtered and analyzed using mothur v 1.35.1 (Schloss et al.,  
167 2009) following the MiSeq SOP (found at <https://www.mothur.org>) with minor modifications  
168 (full workflow for this project can be found at [github.com/diel\\_wetland\\_comm\\_str](https://github.com/diel_wetland_comm_str)). Paired-end



169 sequences were joined into contigs. Sequences with homopolymers > 8 bases and sequences  
170 either less than 251 bp or greater than 254 bp were removed. Sequences were aligned against the  
171 Silva (v. 119) V4 rRNA gene reference database (Quast et al., 2012), and sequences which did  
172 not align within the V4 region were eliminated from further analysis. Using UCHIME (Edgar et  
173 al., 2011), chimeric DNA was searched for and removed from the dataset. Sequences were  
174 classified employing the Ribosomal Database Project (training set v. 9; Cole et al., 2013) using a  
175 confidence threshold of 80%. After taxonomic classification, if a sequence was identified as  
176 originating from chloroplast, eukaryotic, mitochondrial, or unknown sources, it was eliminated.  
177 Remaining sequences were clustered into Operational Taxonomic Units (OTUs) at the 0.03  
178 sequence similarity level using the optclust algorithm. Sequencing reads can be found in the  
179 Sequence Read Archive (SRA) under accession number SRP151564.

180

### 181 *Microbial community rRNA DGGE analysis*

182 The 2016 RNA samples were examined with PCR-DGGE (denaturing gradient gel  
183 electrophoresis) to characterize the active dominant microbial community composition. RNA  
184 was extracted using MoBio PowerWater RNA Isolation Kit according to manufacturer's  
185 protocol. Extracted RNA was cleaned and concentrated using Zymo (Irvine, CA) Clean &  
186 Concentrator kit and quantified using a Qubit<sup>®</sup> 2.0 fluorometer. RNA was converted to cDNA  
187 using Applied Biosystems (Foster City, CA) High Capacity cDNA Reverse Transcription kit.  
188 cDNA samples were amplified using bacterial primers 338f (ACT CCT ACG GGA GCG AGC  
189 AG) with a GC clamp attached to the 5' end, and 519r (ATT ACC GCG GCT GCT GG)

190 (Morgan et al., 2002). A standard PCR mix was used (Thermo Scientific, Waltham, MA) to  
191 which additional  $\text{MgCl}_2$  (Promega, Madison, WI) was added to bring the final concentration to  
192 3.5 mM. In addition, Bovine Serum Albumin (Promega, Madison, WI) was added to a final  
193 concentration of 0.5  $\mu\text{g}/\mu\text{L}$ . After an initial denaturation at 94°C for 5 min, 28 cycles of (1)  
194 denaturation at 92°C for 30 s, (2) annealing at 57°C for 20 s, and (3) extension at 72°C for 30 s  
195 were performed and followed by a final extension at 72°C for 7 min.

196 After PCR, DGGE was performed using 8% (w/v) polyacrylamide gels (37.5:1  
197 acrylamide/bisacrylamide) with denaturing gradients that ranged from 30% to 52.5% (100%  
198 denaturant contains 40% [vol/vol] formamide and 7 M urea). Aliquots of 20  $\mu\text{L}$  from the PCR  
199 reaction were subjected to DGGE. Each gel was run at 60°C and 200 V for 330 min. After  
200 electrophoresis, gels were stained with GelGreen Nucleic Acid Stain (Biotium) and imaged using  
201 a ChemiDoc Touch Imaging System (Bio-Rad Laboratories, Hercules, CA). Bands on DGGE  
202 gels are assumed to represent members of the microbial community that make up > 1% of the  
203 population in a sample (Muyzer et al. 1993).

204

## 205 **Statistical analyses**

206 The R statistical environment was used for statistical analyses (R Core Team, 2015).  
207 Principal Component Analysis (PCA) was used to visualize physical and chemical differences  
208 among samples. To address collinearity, highly correlated environmental variables ( $r > 0.7$ ;  $p <$   
209 0.001) were removed from analysis save for one of the correlated variables in order to avoid  
210 exaggeration of PCA structure (DOC correlated with OrP,  $\text{NH}_3^-$  correlated with TN, SRP

211 correlated with TP). Permutational Multivariate Analysis of Variance (perMANOVA)  
212 (Anderson, 2001) was used to determine significant differences in physicochemical profiles  
213 among wetlands, sampling zones, and time of day.

214 One sample (out of three) of PM zone “B” at the first dusk sampling timepoint was  
215 removed from analysis as it was likely an artefactual result according to microbial community  
216 structure (95% composed of *Firmicutes* and *Actinobacteria*), which was distinct from replicates  
217 and all other samples (Supplemental Fig. 1). If a sample was represented by less than 1,000  
218 sequences and Good’s coverage was  $< 90\%$  (prior to removal of singletons and doubletons), the  
219 sample was also removed from further analyses. Good’s coverage estimates ranged from 94.2 –  
220 99.6% among samples save for one sample which was estimated at 49.0% coverage due to low  
221 sequencing depth ( $n = 288$  sequences), and was therefore, removed from further analyses.  
222 Variability in microbial community beta diversity among wetlands was visualized through  
223 NMDS based on Bray-Curtis dissimilarity among samples. The *envfit* function and a ranked  
224 Mantel test (where Euclidean distance was used to generate a distance matrix based on  
225 geochemical profiles) from the Vegan package (Oksanen et al., 2007) were used to determine  
226 relationships between microbial community structure and environmental variables among  
227 wetlands. perMANOVA was used to explore whether wetlands were distinct in microbial  
228 community structure, and whether interactions between wetland, sampling zone, and time of day  
229 were also significant in explaining differences in microbial community profiles.

230 To further assess the degree of variability among microbial communities between diel  
231 sampling points, each wetland was analyzed individually to control for differences in community

232 structure among wetlands. NMDS was performed for each wetland, as well as for each zone of  
233 sampling within each wetland. To test for significant differences between time and sampling  
234 points, perMANOVA was performed for each wetland and zone of sampling within each  
235 wetland.

236 DGGE profiles of different samples within each wetland were compared by calculating  
237 Jaccard distance coefficients based on the presence/absence of bands. Significant differences  
238 between time points were analyzed by performing perMANOVA to test for significant  
239 differences in active communities between dawn and dusk time points.

240 To explore whether relationships between microbial subnetworks, taxa, and  $O_2$ , pH, or  
241 temperature fluxes existed within each wetland, weighted correlation network analysis  
242 (WGCNA) was implemented using the *WGCNA* package (Langfelder & Horvath, 2008;  
243 Langfelder & Horvath, 2012) as previously described (Guidi et al., 2016; Henson et al., 2016;  
244 Horton et al., *in review*) with minor modifications. In summary, WGCNA analysis was applied  
245 to each sampling zone (A versus B) within each wetland separately, totaling 8 separate analyses.  
246 An OTU was removed from further analysis if it did not appear at least twice within at least 25%  
247 of the samples explored to control for erroneous correlations (similar to as applied by Henson et  
248 al., 2018). OTU abundances were normalized using variance stabilizing transformation (VST).  
249 Constructed dissimilarity matrices were then raised to a soft threshold power to ensure scale-free  
250 topology. This power was chosen on an individual basis for each dissimilarity matrix based on  
251 which soft threshold power met the assumption of scale-free topology, while allowing for the  
252 greatest connectivity among OTUs within the network. Topological overlap matrices (TOMs)

253 were created, and subnetworks were generated using TOMs and hierarchical clustering. Pearson  
254 correlations were calculated between the assigned eigenvalue for each subnetwork (defined as  
255 the first principal component representing a given subnetwork) and dissolved oxygen, pH, and  
256 temperature levels to explore relationships between subnetworks of microbial taxa and diel  
257 fluxes. The subnetworks with the strongest correlations (if  $r > 0.7$ ,  $p < 0.01$ ) to environmental  
258 variables were selected for further exploration. Partial least squares regression (PLS) models  
259 were employed to explore the ability of subnetworks to predict levels of O<sub>2</sub>, where leave-one-out  
260 cross-validation (LOOCV) predicted values were used to test the ability of the PLS model to  
261 predict measured values. Variable importance in projection (VIP) (Chong & Jun, 2005) defined  
262 the contribution of each OTU in predicting values of environmental variables during PLS. For  
263 visualization purposes, the minimum correlation ( $r$ ) between two OTUs to constitute a  
264 relationship was delineated between 0.1 and 0.15 dependent upon the strength of OTU – OTU  
265 correlations within each subnetwork. The sum of relationships an OTU possesses with other  
266 OTUs within a network was defined as “node centrality”.

267

## 268 **RESULTS AND DISCUSSION**

### 269 **Each wetland experienced distinct diel fluxes in physical and chemical conditions**

270 The four tested wetlands were distinct in physical and chemical conditions according to  
271 perMANOVA ( $r^2 = 0.435$ ,  $p < 0.001$ ) and pairwise comparisons (Supplemental Table 2).  
272 Specifically, Miller’s Marsh wetland sites (MM and NM) exhibited higher OrP, temperature,  
273 average O<sub>2</sub> levels, and pH than wetlands sampled in Mount Pleasant, MI (CW and PM) (Fig. 1;

274 Supplemental Table 1). CW and PM wetlands were relatively higher in specific conductivity,  
275 turbidity, and chlorophyll-a concentrations. A beta-dispersion test (Anderson, 2006; Anderson et  
276 al., 2006) found that physicochemical variance among samples within each wetland was not  
277 significantly different among wetlands. Further, perMANOVA found significant interaction  
278 effects among wetlands, sampling zones, and time of day (Supplemental Table 3), suggesting  
279 that diel physicochemical fluxes were variable among wetlands and sampling zones. Wetlands  
280 located on Beaver Island, MI (MM and NM) experienced relatively steeper and more consistent  
281 diel fluctuations in dissolved oxygen than those located within Mount Pleasant, MI (CW and  
282 PM), particularly within sampling zone “B” (Fig. 2). The degree to which temperature and pH  
283 varied between dawn and dusk time points were relatively consistent among all wetlands, save  
284 for relatively larger variability in pH within site MM.

285

### 286 **Total microbial community structure was primarily stable throughout diel fluxes**

287 After quality filtering of sequence data, a total of 11,655,362 sequences remained. Both  
288 perMANOVA ( $r^2 = 0.516$ ;  $p < 0.001$ ) and pairwise perMANOVAs demonstrated that microbial  
289 communities were unique to each wetland (Fig. 3; Supplemental Table 2). The differences  
290 among microbial communities were likely driven by distinct environmental conditions among  
291 each wetland, as wetland physicochemistry and community structure were related according to a  
292 ranked Mantel test ( $r = 0.577$ ,  $p \leq 0.001$ ). Corroborating this, the NMDS ordination was  
293 correlated to differences in multiple environmental variables (Fig. 3). Wetlands with distinct  
294 microbial community structure are frequently distinct in geochemical properties (Peralta et al.,

295 2013; Ligi et al., 2014), which is consistent with microbial community patterns in the wetlands  
296 studied here. As microbial communities were distinct among all wetlands, individual wetlands  
297 were independently examined for relationships between microbial community structure and  
298 environmental fluxes. Further, as interaction effects were significant between wetland and  
299 sampling zone (perMANOVA,  $r^2 = 0.06$ ,  $p \leq 0.001$ ), each wetland was also explored to examine  
300 whether microbial communities were spatially distinct.

301 Microbial community structure consistently varied between sampling zones according to  
302 perMANOVA and NMDS within each wetland (Fig. 4; Supplemental Table 4). These results  
303 show that spatial differences exist within the tested 3-meter scale and underscore the importance  
304 of analyzing spatially distinct zones within wetland systems, as microbial communities can be  
305 distinct in community structure throughout a wetland, and therefore, may respond to diel fluxes  
306 differentially. Similar types of spatial variability in bacterial communities has also been found in  
307 other studies which explored wetland microbial communities (Song et al., 2012; Narrowe et al.,  
308 2017). While microbial community structure can also be impacted by dominant vegetative type  
309 (Tang et al., 2011), the samples collected in this study were taken within the same vegetation  
310 type (defined as at least 75% of one morphotype). Thus, it is reasonable to suggest that point of  
311 sampling has a profound effect on microbial community structure even at finer spatial scales than  
312 “vegetation zone” within wetlands, possibly related to differences in water depth.

313 Changes in microbial community beta diversity between dawn and dusk time points were  
314 only significant in zone “B” of MM according to perMANOVA ( $r^2 = 0.140$ ,  $p = 0.007$ ).  
315 Interestingly, total community structure was variable in zone “B” of MM (based on sequencing

316 data from DNA), but DGGE analysis of active microbial community structure (via RNA  
317 extractions) did not oscillate between night and day time points within either MM or NM (Fig.  
318 5). These data suggested that the dominantly active microbial community may not be driving  
319 daily shifts in microbial community structure found in MM, and that a subset of less abundant  
320 microbial taxa could be driving community-level changes in MM. Overall, these results contrast  
321 with those found by Kearns et al. (2017), where it was established that the active microbial  
322 community shifted over a daily cycle within salt marsh water. However, salt marshes are unique  
323 in that they are transient systems which alternate between influxes of saltwater and periods of  
324 stagnation, whereas the freshwater wetlands studied here were closed, stable systems.

325 Dominant microbial community members within closed freshwater wetland water  
326 columns may be adapted to diurnal fluctuations of environmental variables (such as  $O_2$ ,  
327 temperature, and pH). It has been shown that some microbial taxa may retain the ability of  
328 functional plasticity in the face of disturbance (Shade et al., 2012), and dominant microbial  
329 community members may exhibit such plasticity through adaptation to daily fluctuation regimes.  
330 Microbial dormancy may also be contributing to a lack of community structure differences  
331 between dawn and dusk within wetland water. Inactive community members have been found to  
332 constitute close to 30% of communities within freshwater systems (Lennon & Jones, 2011) and  
333 estimated at up to 62% of community membership in a saltwater marsh which experienced diel  
334 fluxes (Kearns et al., 2017). Further, DNA within freshwater environments can remain detectable  
335 for several days after removal of the DNA source (Dejean et al., 2011), thus persistence of



336 microbial community DNA from dead cells may contribute to masking fine-scale community  
337 composition shifts.

338

### 339 **Microbial subcommunities respond to diel O<sub>2</sub> fluxes in freshwater wetlands**

340 Diel fluxes showed little to no influence on beta diversity, however, these communities  
341 were further explored at a finer resolution to determine if potential subnetworks of taxa may  
342 have been impacted by fluctuating environmental conditions. Network analysis, via WGCNA,  
343 showed that each wetland harbored unique subnetworks of taxa that correlated with fluctuating  
344 environmental factors. Specifically, two subnetworks correlated with fluctuating dissolved  
345 oxygen levels within wetlands MM and PM.

346 Within MM sampling zone “B” (which experienced steep oxygen fluctuation regimes),  
347 the subnetwork most related to dissolved oxygen concentrations was 34.6% predictive of  
348 dissolved oxygen levels according to PLS modeling. Additionally, the same subnetwork that  
349 correlated to DO ( $r = 0.7$ ,  $p = 0.01$ ) also significantly correlated with shifts in temperature ( $r =$   
350  $0.7$ ,  $p = 0.01$ ) (Fig. 6). This subnetwork was composed of taxa spanning several phyla and  
351 individual OTUs whose relative abundances were (either positively or negatively) correlated  
352 with dissolved oxygen levels. OTUs related to *Alphaproteobacteria* possessed some of the  
353 highest VIP scores and were positively related to DO concentrations, along with other OTUs  
354 associated with *Mycobacterium* (*Actinobacteria*), *Sphingobacteriales* (*Bacteroidetes*), and  
355 *Armatimonadetes* Gp1. Interestingly, an aerobic representative within Gp1 of *Armatimonadetes*  
356 (*Armatimonas rosa*) was isolated from the rhizoplane of a common wetland grass *Phragmites*

357 *australis* and has also been shown to be incapable of nitrate respiration or fermentation (Tamaki  
358 et al., 2011). Therefore, this isolate may be sensitive to diel O<sub>2</sub> fluxes, which have been shown to  
359 occur within wetland plant rhizospheres (Nikolausz et al., 2008). OTUs which possessed high  
360 VIP scores and were negatively correlated to dissolved oxygen included those related to  
361 *Methylococcales* and other *Proteobacteria*, as well as *Verrucomicrobia* Subdivision 3.  
362 *Methylococcales*, an order of bacteria representing known methanotrophs, has been shown to  
363 decrease in abundance with increasing O<sub>2</sub> levels within the oxygen minimum zone (OMZ) of  
364 Golfo Dulce, Costa Rica (Padilla et al., 2017). Further, *Methylococcales* have been found to pair  
365 oxidation of methane with partial denitrification (Padilla et al., 2017). Thus, the relative  
366 abundances of *Methylococcales* OTUs documented in this study may be responding to  
367 fluctuations in diel chemical and physical conditions.

368 While there were no significant differences in total microbial community structure  
369 between dawn and dusk within PM, WGCNA found a subcommunity that was significantly  
370 related to the narrow range of dissolved oxygen fluctuations within this wetland. This  
371 subcommunity was 66.8% predictive of dissolved oxygen concentrations in zone “B” of PM  
372 according to PLS modeling. This subnetwork correlated with DO ( $r = 0.78$ ,  $p = 0.004$ ), and also  
373 correlated with pH ( $r = 0.83$ ,  $p = 0.002$ ) (Fig. 7). OTUs with high VIP values that positively  
374 correlated with dissolved oxygen included *Aquabacterium* (*Betaproteobacteria*), *Rheinheimera*  
375 (*Gammaproteobacteria*), *Bacteroidetes*, and *Verrucomicrobia* Subdivision 3. *Aquabacterium* and  
376 *Rheinheimera* have been isolated from freshwater sources and characterized as facultative  
377 anaerobes capable of nitrate reduction (Kalmbach et al., 1999; Merchant et al., 2007; Chen et al.,

378 2010). Conversely, OTUs that negatively correlated with dissolved oxygen were *Acidobacteria*  
379 Gp 6, *Chloroflexi*, and candidate phylum OD1 (also known as *Parcubacteria*). Interestingly,  
380 *Parcubacteria* have been suggested as taxa with reduced metabolic capabilities, potentially due  
381 to obligate parasitic strategies according to genomic analyses (Nelson & Stegen, 2015), and as  
382 such, may be dependent on other organisms which are sensitive to diel fluxes. It is also possible  
383 that the two taxonomically distinct subnetworks found to be related to O<sub>2</sub> within MM and PM  
384 contained some microbial taxa that maintain similar metabolic strategies which coincide with  
385 redox-controlled elemental transformations that commonly occur in wetlands (Jørgensen et al.,  
386 1979; Laursen & Seitzinger, 2004; Harrison et al., 2005). However, more research would be  
387 necessary to understand whether functional redundancy of microbial communities existed among  
388 these wetlands.

389 Interestingly, NM experienced the most dramatic daily O<sub>2</sub> fluxes, and did not possess  
390 any unique subnetworks of microbial taxa related to oxygen fluxes as found in MM within the  
391 same wetland system. These data further allude to idiosyncrasy that may exist among the  
392 microbial community response to diel O<sub>2</sub> fluxes within wetlands, possibly dependent upon  
393 microbial community taxonomic membership and physicochemical differences among wetlands.

394

## 395 **CONCLUSIONS**

396 It is evident that the wetlands examined in this study were unique in both  
397 physicochemical and microbial fingerprints, and specific elements of these wetland ecosystems  
398 may have influenced the degree to which the microbial community structure responded to natural

399 diel fluxes. Broad community beta diversity patterns were found to significantly differ between  
400 dawn and dusk time periods in only one out of eight wetland zones. Rather, small subnetworks of  
401 taxa were more often found to shift with oxygen levels within each wetland. Therefore, it is  
402 likely that dominant microbial taxa within these freshwater wetlands (and wetland zones) remain  
403 structurally stable throughout the day, while smaller subsets of community members are more  
404 sensitive to daily environmental fluxes. Further research is necessary to fully understand how  
405 diel fluxes impact the function of microbial communities. Nevertheless, this research highlights  
406 the importance of exploring microbial communities at finer resolutions (subcommunities) which  
407 may be masked by examining patterns across the entire microbial community.

408

#### 409 **ACKNOWLEDGEMENTS**

410 We would like to thank Miranda Hengy, Adam Byrne, and Shanker Tamang for their  
411 assistance in the sampling of these wetlands and John Gordon and the CMU Biological Station  
412 staff for all their logistical assistance. Funding for this project was provided by the CMU  
413 Institute for Great Lakes Research. This is contribution number XXX of the Institute for Great  
414 Lakes Research.

415

#### 416 **REFERENCES**

417 Anderson, M.J. (2001). A new method for non-parametric multivariate analysis of variance.  
418 *Austral Ecol* 26(1): 32-46.

419

- 420 Anderson, M.J. (2006). Distance-based tests for homogeneity of multivariate dispersions.  
421 Biometrics 62(1): 245-253.  
422
- 423 Anderson, M.J., Ellingsen, K.E., and McArdle, B.H. (2006). Multivariate dispersion as a  
424 measure of beta diversity. Ecol Lett 9(6): 683-693.  
425
- 426 Andrade, K., Logemann, J., Heidelberg, K.B., Emerson, J.B., Comolli, L.R., Hug, L.A., et al.  
427 (2015). Metagenomic and lipid analyses reveal a diel cycle in a hypersaline microbial ecosystem.  
428 ISME J 9(12): 2697-2711.  
429
- 430 Beck, N.G., and Bruland, K.W. (2000). Diel biogeochemical cycling in a hyperventilating  
431 shallow estuarine environment. Estuaries Coasts 23(2): 177-187.  
432
- 433 Caporaso, J.G., Lauber, C.L., Walters, W.A., Berg-Lyons, D., Huntley, J., Fierer, N., et al.  
434 (2012). Ultra-high-throughput microbial community analysis on the Illumina HiSeq and MiSeq  
435 platforms. ISME J 6(8): 1621-1624.  
436
- 437 Chen, W. M., Lin, C. Y., Young, C. C., & Sheu, S. Y. (2010). *Rheinheimera aquatica* sp. nov.,  
438 an antimicrobial activity producing bacterium isolated from freshwater culture pond. J Microbiol  
439 Biotechnol 20(10): 1386-1392.  
440

- 441 Chong, I.G., and Jun, C.H. (2005). Performance of some variable selection methods when  
442 multicollinearity is present. *Chemometr Intell Lab* 78(1): 103-112.
- 443
- 444 Cole J.R., Wang Q., Fish J.A., Chai B., Mcgarrell D.M., Sun Y., et al. (2013) Ribosomal  
445 Database Project: data and tools for high throughput rRNA analysis. *Nucleic Acids Res* 42(D1):  
446 doi:10.1093/nar/gkt1244
- 447
- 448 Cornell, L.P., and Klarer, D. M. (2008). Patterns of dissolved oxygen, productivity and  
449 respiration in Old Woman Creek Estuary, Erie County, Ohio during low and high water  
450 conditions. *Ohio J Sci* 108(3): 31.
- 451
- 452 Dejean, T., Valentini, A., Duparc, A., Pellier-Cuit, S., Pompanon, F., Taberlet, P., & Miaud, C.  
453 (2011). Persistence of environmental DNA in freshwater ecosystems. *PloS One* 6(8): e23398.
- 454
- 455 Edgar, R.C., Haas, B.J., Clemente, J.C., Quince, C., and Knight, R. (2011). UCHIME improves  
456 sensitivity and speed of chimera detection. *Bioinformatics* 27(16): 2194-2200.
- 457
- 458 Ehrlich, H. L. (1997). Microbes and metals. *Appl Microbiol Biot* 48(6): 687-692.
- 459
- 460 Firestone, M.K., and Davidson, E.A. (1989). Microbiological basis of NO and N<sub>2</sub>O production  
461 and consumption in soil. *Life Sci R* 47: 7-21.

462

463 Ghiglione, J.F., Mevel, G., Pujo-Pay, M., Mousseau, L., Lebaron, P., and Goutx, M. (2007). Diel  
464 and seasonal variations in abundance, activity, and community structure of particle-attached and  
465 free-living bacteria in NW Mediterranean Sea. *Microb Ecol* 54(2): 217-231.

466

467 Guidi, L., Chaffron, S., Bittner, L., Eveillard, D., Larhlimi, A., Roux, S., et al. (2016). Plankton  
468 networks driving carbon export in the oligotrophic ocean. *Nature* 532(7600): 465.

469

470 Harrison, J.A., Matson, P.A., and Fendorf, S.E. (2005). Effects of a diel oxygen cycle on  
471 nitrogen transformations and greenhouse gas emissions in a eutrophied subtropical stream. *Aquat*  
472 *Sci* 67(3): 308-315.

473

474 Henson, M.W., Hanssen, J., Spooner, G., Flemming, P., Pukonen, M., Stahr, F., and Thrash, J.C.  
475 (2016). Nutrient dynamics and stream order influence microbial community patterns along a  
476 2914 km transect of the Mississippi River. *bioRxiv*: 091512.

477

478 Horton, D.J., Theis, K.R., Uzarski, D.G., and Learman, D.R. (2017). Microbial community  
479 structure corresponds to nutrient gradients and human impact within coastal wetlands of the  
480 Great Lakes. *bioRxiv*: 217919.

481

482 Jørgensen, B.B., Revsbech, N.P., Blackburn, T.H., and Cohen, Y. (1979). Diurnal cycle of  
483 oxygen and sulfide microgradients and microbial photosynthesis in a cyanobacterial mat  
484 sediment. *Appl Environ Microb* 38(1): 46-58.

485  
486 Kalmbach, S., Manz, W., Wecke, J., & Szewzyk, U. (1999). *Aquabacterium* gen. nov., with  
487 description of *Aquabacterium citratiphilum* sp. nov., *Aquabacterium parvum* sp. nov. and  
488 *Aquabacterium commune* sp. nov., three in situ dominant bacterial species from the Berlin  
489 drinking water system. *Int J Syst Evol Micr* 49(2): 769-777.

490  
491 Kearns, P.J., Holloway, D., Angell, J.H., Feinman, S.G., and Bowen, J.L. (2017). Effect of short-  
492 term, diel changes in environmental conditions on active microbial communities in a salt marsh  
493 pond. *Aquat Microb Ecol* 80(1): 29-41.

494  
495 Kozich, J.J., Westcott, S.L., Baxter, N.T., Highlander, S.K., and Schloss, P.D. (2013)  
496 Development of a Dual-Index Sequencing Strategy and Curation Pipeline for Analyzing  
497 Amplicon Sequence Data on the MiSeq Illumina Sequencing Platform. *Appl Environ Microb*  
498 79(17): 5112-5120.

499  
500 Kuehn, K.A., Steiner, D., and Gessner, M.O. (2004). Diel mineralization patterns of  
501 standing  $\square$  dead plant litter: Implications for  $\text{CO}_2$  flux from wetlands. *Ecology* 85(9): 2504-2518.

502



503 Langfelder, P., and Horvath, S. (2008). WGCNA: an R package for weighted correlation  
504 network analysis. *BMC Bioinformatics* 9(1): 559.

505

506 Langfelder, P., and Horvath, S. (2012). Fast R functions for robust correlations and hierarchical  
507 clustering. *J Stat Softw* 46(11).

508

509 Laursen, A.E., and Seitzinger, S.P. (2004). Diurnal patterns of denitrification, oxygen  
510 consumption and nitrous oxide production in rivers measured at the whole-reach scale.  
511 *Freshwater Biol* 49(11): 1448-1458.

512

513 Lennon, J.T., and Jones, S.E. (2011). Microbial seed banks: the ecological and evolutionary  
514 implications of dormancy. *Nat Rev Microbiol* 9(2): 119-130.

515

516 Ligi, T., Oopkaup, K., Truu, M., Preem, J.K., Nõlvak, H., Mitsch, W.J., et al. (2014).  
517 Characterization of bacterial communities in soil and sediment of a created riverine wetland  
518 complex using high-throughput 16S rRNA amplicon sequencing. *Ecol Eng* 72: 56-66.

519

520 Maynard, J.J., Dahlgren, R.A., and O'Geen, A.T. (2012). Quantifying spatial variability and  
521 biogeochemical controls of ecosystem metabolism in a eutrophic flow-through wetland. *Ecol*  
522 *Eng* 47: 221-236.

523

- 524 Merchant, M. M., Welsh, A. K., & McLean, R. J. (2007). *Rheinheimera texasensis* sp. nov., a  
525 halointolerant freshwater oligotroph. *Int J Syst Evol Micr* 57(10): 2376-2380.
- 526
- 527 McCarthy, A., Chiang, E., Schmidt, M. L., & Deneff, V. J. (2015). RNA preservation agents and  
528 nucleic acid extraction method bias perceived bacterial community composition. *PLoS One*  
529 10(3): e0121659.
- 530
- 531 Morgan, C.A., Hudson, A., Konopka, A., and Nakatsu, C.H. (2002). Analyses of microbial  
532 activity in biomass-recycle reactors using denaturing gradient gel electrophoresis of 16S rDNA  
533 and 16S rDNA PCR products. *Can. J. Microbiol.* 48: 331–341.
- 534
- 535 Morris, J.J., Johnson, Z.I., Wilhelm, S.W., and Zinser, E.R. (2016). Diel regulation of hydrogen  
536 peroxide defenses by open ocean microbial communities. *J Plankton Res* 38(4): 1103-1114.
- 537
- 538 Muyzer, G., de Waal, E., and Uitterlinden, A. (1993). Profiling of complex microbial populations  
539 by denaturing gradient gel electrophoresis analysis of polymerase chain reaction-amplified genes  
540 coding for 16S rRNA. *Appl Environ Microbiol* 59: 695–700.
- 541
- 542 Narrowe, A. B., Angle, J. C., Daly, R. A., Stefanik, K. C., Wrighton, K. C., & Miller, C. S.  
543 (2017). High-resolution sequencing reveals unexplored archaeal diversity in freshwater wetland  
544 soils. *Environ Microbiol*, 19(6), 2192-2209.

545

546 Nelson, W. C., & Stegen, J. C. (2015). The reduced genomes of Parcubacteria (OD1) contain

547 signatures of a symbiotic lifestyle. *Front Microbiol* 6: 713.

548

549 Nikolausz, M., Kappelmeyer, U., Székely, A., Rusznyák, A., Márialigeti, K., and Kästner, M.

550 (2008). Diurnal redox fluctuation and microbial activity in the rhizosphere of wetland plants. *Eur*

551 *J Soil Biol* 44(3): 324-333.

552

553 Oksanen, J., Kindt, R., Legendre, P., O'Hara, B., Stevens, M.H.H., Oksanen, M.J., and Suggests,

554 M.A.S.S. (2007). The vegan package. *Community ecology package*, 10, 631-637.

555

556 Ottesen, E.A., Young, C.R., Gifford, S.M., Eppley, J.M., Marin, R., Schuster, S.C., et al. (2014).

557 Multispecies diel transcriptional oscillations in open ocean heterotrophic bacterial assemblages.

558 *Science* 345(6193): 207-212.

559

560 Padilla, C.C., Bertagnolli, A.D., Bristow, L.A., Sarode, N., Glass, J.B., Thamdrup, B., and

561 Stewart, F.J. (2017). Metagenomic binning recovers a transcriptionally active

562 Gammaproteobacterium linking methanotrophy to partial denitrification in an anoxic oxygen

563 minimum zone. *Front Marine Sci* 4: 23.

564

565 Peralta, R.M., Ahn, C., and Gillevet, P.M. (2013). Characterization of soil bacterial community  
566 structure and physicochemical properties in created and natural wetlands. *Sci Total Environ* 443:  
567 725-732.

568

569 Quast C., Pruesse E., Yilmaz P., Gerken J., Schweer T., Yarza P., et al. (2012). The SILVA  
570 ribosomal RNA gene database project: improved data processing and web-based tools. *Nucleic  
571 Acids Res* 41(D1): D590-D596.

572

573 R Core Team (2015) R: A language and environment for statistical computing. Vienna, Austria.  
574 <https://www.R-project.org/>.

575

576 Reddy, K.R., and DeLaune, R.D. (2008). *Biogeochemistry of wetlands: science and applications*.  
577 Boca Raton, FL: CRC Press.

578

579 Reeder, B.C. (2011). Assessing constructed wetland functional success using diel changes in  
580 dissolved oxygen, pH, and temperature in submerged, emergent, and open-water habitats in the  
581 Beaver Creek Wetlands Complex, Kentucky (USA). *Ecol Eng* 37(11): 1772-1778.

582

583 Rowe, J.W. (2003). Activity and movements of midland painted turtles (*Chrysemys picta  
584 marginata*) living in a small marsh system on Beaver Island, Michigan. *J Herpetol* 37(2): 342-  
585 353.

586

587 Schloss P.D., Westcott S.L., Ryabin T., Hall J.R., Hartmann M., Hollister E.B., et al. (2009)

588 Introducing mothur: Open-Source, Platform-Independent, Community-Supported Software for

589 Describing and Comparing Microbial Communities. *Appl Environ Microbiol* 75(23): 7537-7541.

590 doi:10.1128/aem.01541-09

591

592 Shade, A., Peter, H., Allison, S.D., Baho, D.L., Berga, M., Bürgmann, H., et al. (2012).

593 Fundamentals of microbial community resistance and resilience. *Front Microbiol* 3.

594

595 Song, K., Kang, H., Zhang, L., & Mitsch, W. J. (2012). Seasonal and spatial variations of

596 denitrification and denitrifying bacterial community structure in created riverine wetlands. *Ecol*

597 *Eng*, 38(1), 130-134.

598

599 Tang, Y.S., Wang, L., Jia, J.W., Fu, X.H., Le, Y.Q., Chen, X.Z., and Sun, Y. (2011). Response

600 of soil microbial community in Jiuduansha wetland to different successional stages and its

601 implications for soil microbial respiration and carbon turnover. *Soil Biol Biochem* 43(3): 638-

602 646.

603

604 Tamaki, H., Tanaka, Y., Matsuzawa, H., Muramatsu, M., Meng, X.Y., Hanada, S., et al. (2011).

605 *Armatimonas rosea* gen. nov., sp. nov., of a novel bacterial phylum, Armatimonadetes phyl.

606 nov., formally called the candidate phylum OP10. *Int J Syst Evol Micr* 61(6): 1442-1447.

607

608 Thomas, K.L., Benstead, J., Davies, K.L., and Lloyd, D. (1996). Role of wetland plants in the

609 diurnal control of  $\text{CH}_4$  and  $\text{CO}_2$  fluxes in peat. *Soil Biol Biochem* 28(1): 17-23.

610

611 Venterink, H.O., Hummelink, E., and Van den Hoorn, M.W. (2003). Denitrification potential of

612 a river floodplain during flooding with nitrate-rich water: grasslands versus reedbeds.

613 *Biogeochemistry* 65(2): 233-244.

614

615 Xu, Y., Ma, K., Huang, S., Liu, L., and Lu, Y. (2012). Diel cycle of methanogen *mcrA*

616 transcripts in rice rhizosphere. *Env Microbiol Rep* 4(6): 655-663.

617

618

619

620

621

622

623

624

625

626

627

628  
629  
630  
631  
632  
633  
634  
635  
636  
637  
638  
639  
640  
641  
642  
643  
644  
645  
646  
647  
648

## FIGURES

Figure 1. Principal component analysis of samples characterized by geochemical signatures among wetlands (colors) and time points (shapes). Principal component 1 (36.7% explanatory) and principal component 2 (16.2% explanatory) are displayed. Vectors represent individual geochemical variables separating samples in two-dimensional space. Ellipses represent 95% confidence intervals.

Figure 2. Diel fluctuation of dissolved oxygen (DO), pH, and temperature (Temp) for wetlands a.) CW, b.) MM, c.) PM, and d.) NM during 2015 and 2016. Line color represents sampling zone and year sampled consistent with the legend. Error bars represent +/- standard error.

Figure 3. Nonmetric multidimensional scaling separating samples based upon microbial community structure. Colors represent wetland, while shapes represent time point. Vectors represent significant correlations ( $p < 0.01$ ) of environmental variables to NMDS structure, and vector length represents strength of correlation.

649 Figure 4. NMDS examining microbial community structural relationships among samples within  
650 individual wetlands a.) CW, b.) MM, c.) PM, and d.) NM. Colors represent sampling time point  
651 while shapes represent zone of sampling. Vectors represent significant correlations ( $p < 0.01$ ) of  
652 environmental variables to NMDS structure, and vector length represents strength of correlation.

653  
654 Figure 5. DGGE profiles of RNA samples taken in 2016 and MM and NM wetlands during dawn  
655 and dusk time periods. Numbers represent replicate samples. The two unlabeled lanes were  
656 loaded with a marker produced in our laboratory from the 16SrDNA of several environmental  
657 isolates.

658  
659 Figure 6. Subnetworks with significant relationships to a.) DO concentrations and b.)  
660 temperature from zone “B” of MM. Points correspond to OTUs with network membership. Color  
661 of node corresponds to Phylum, and shape of the node represents relative VIP score. Correlation  
662 to environmental variables for individual OTUs rests on the y-axis, and “node centrality” rests on  
663 the x-axis. OTUs with the top 15 VIP scores are labeled, with corresponding lowest taxonomic  
664 resolution at which they are identified followed by taxonomic identification (D: Domain; P:  
665 Phylum; C: Class; O: Order; F: Family; G: Genus).

666  
667 Figure 7. Subnetworks with significant relationships to a.) DO concentrations and b.) pH from  
668 zone “B” of PM. Points correspond to OTUs with network membership. Color of node  
669 corresponds to Phylum, and shape of the node represents relative VIP score. Correlation to



670 environmental variables for individual OTUs rests on the y-axis, and “node centrality” rests on  
671 the x-axis. OTUs with the top 15 VIP scores are labeled, with corresponding lowest taxonomic  
672 resolution at which they are identified followed by taxonomic identification (D: Domain; P:  
673 Phylum; C: Class; O: Order; F: Family; G: Genus).

674

## 675 **SUPPLEMENTAL INFORMATION**

676 Supplemental information, figures, and tables can be found online at the location  
677 [https://github.com/horto2dj/diel\\_wetland\\_comm\\_str](https://github.com/horto2dj/diel_wetland_comm_str).

678

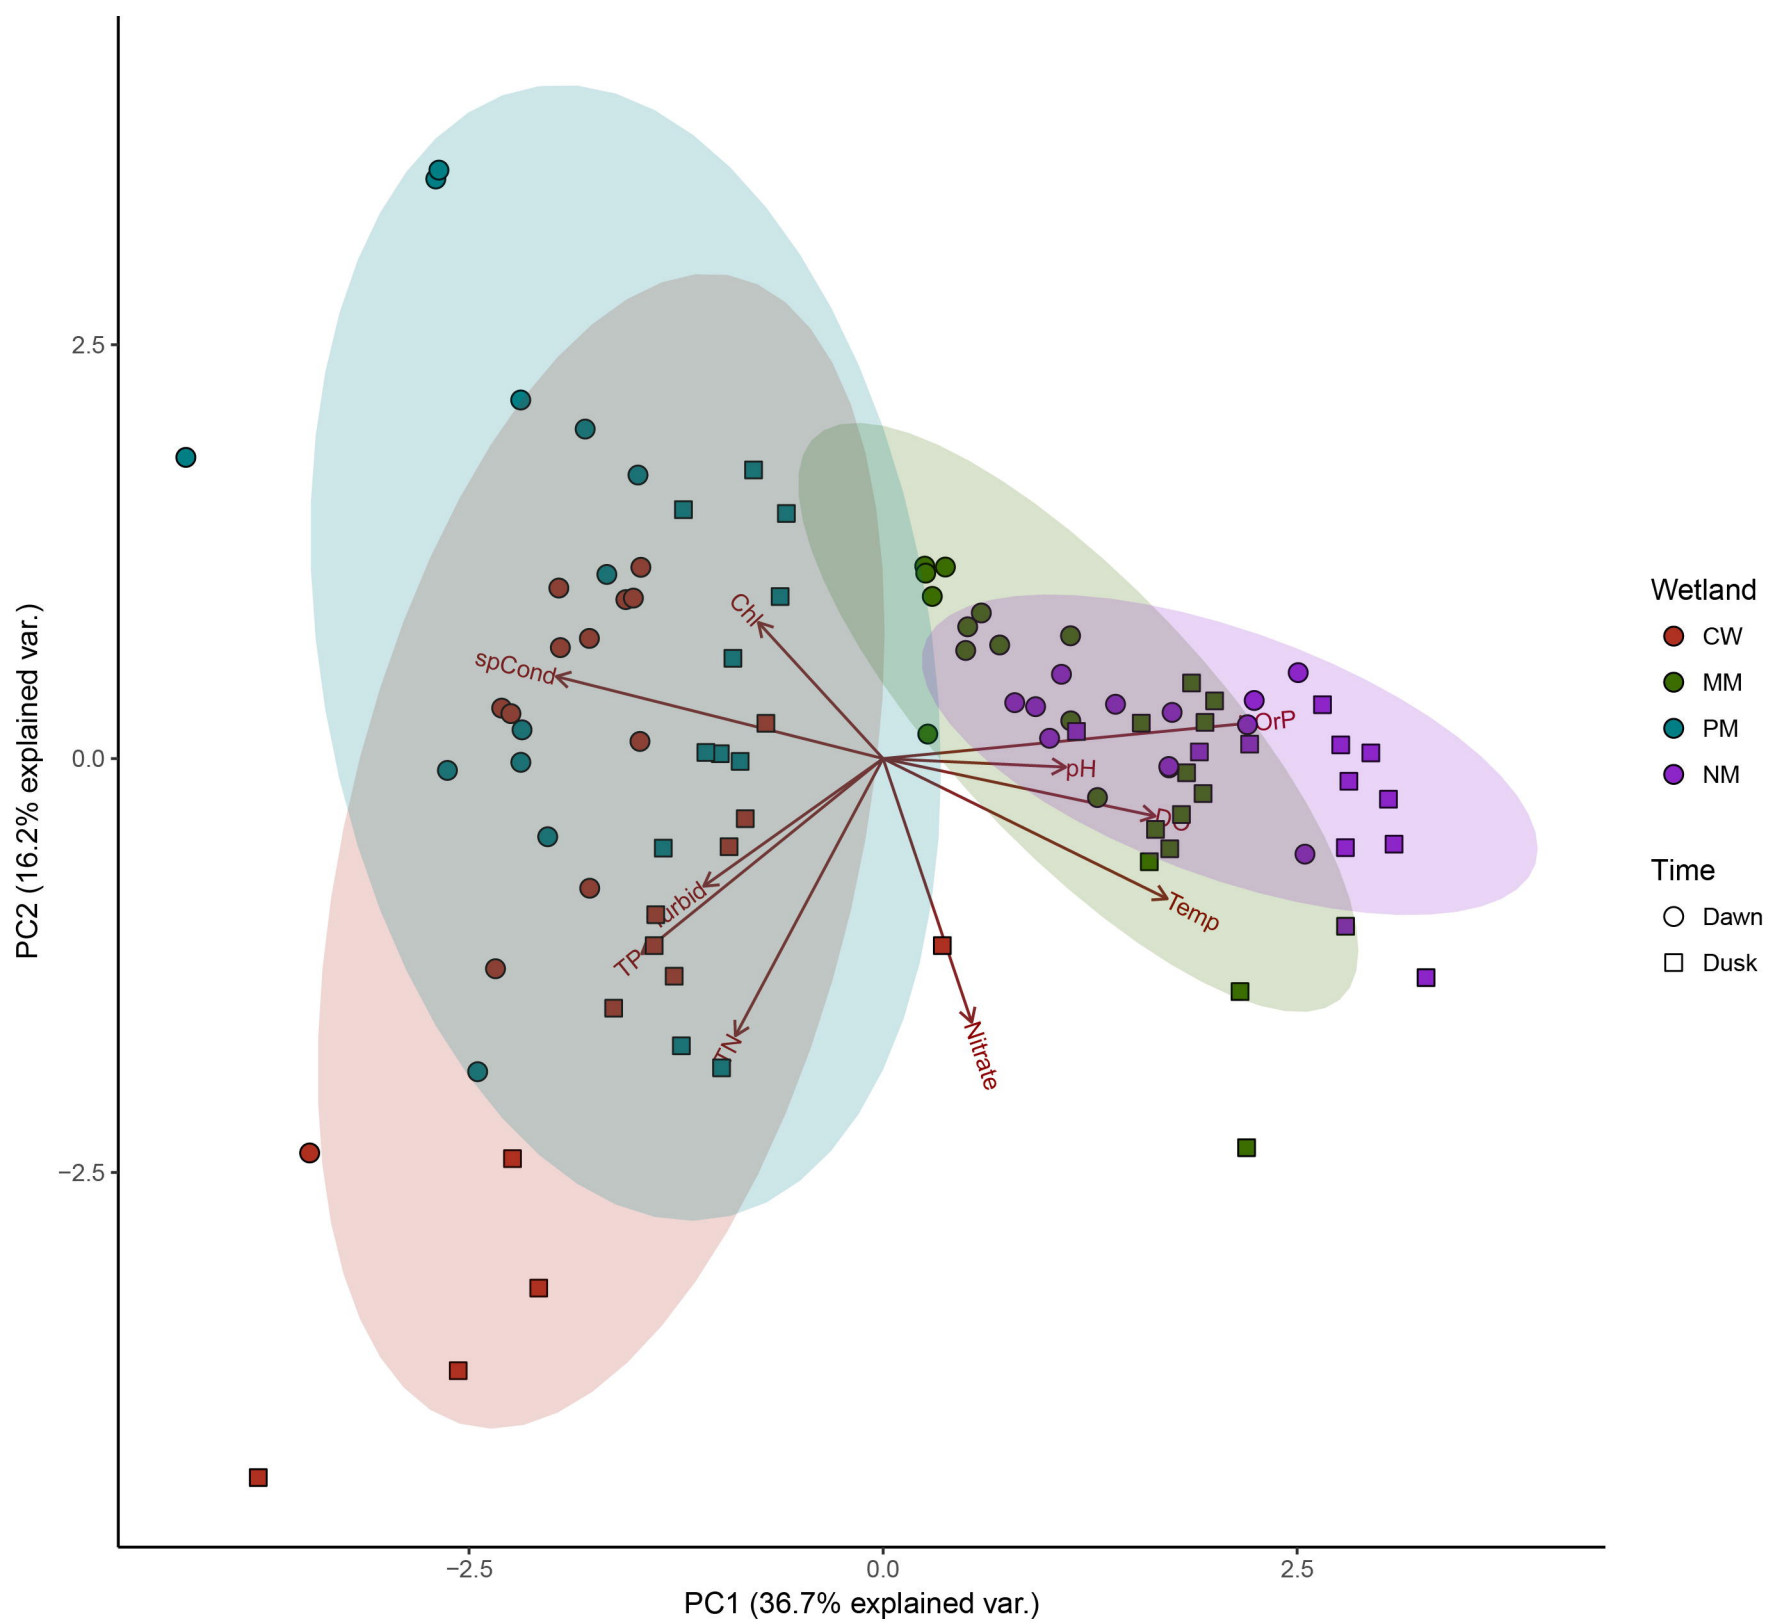

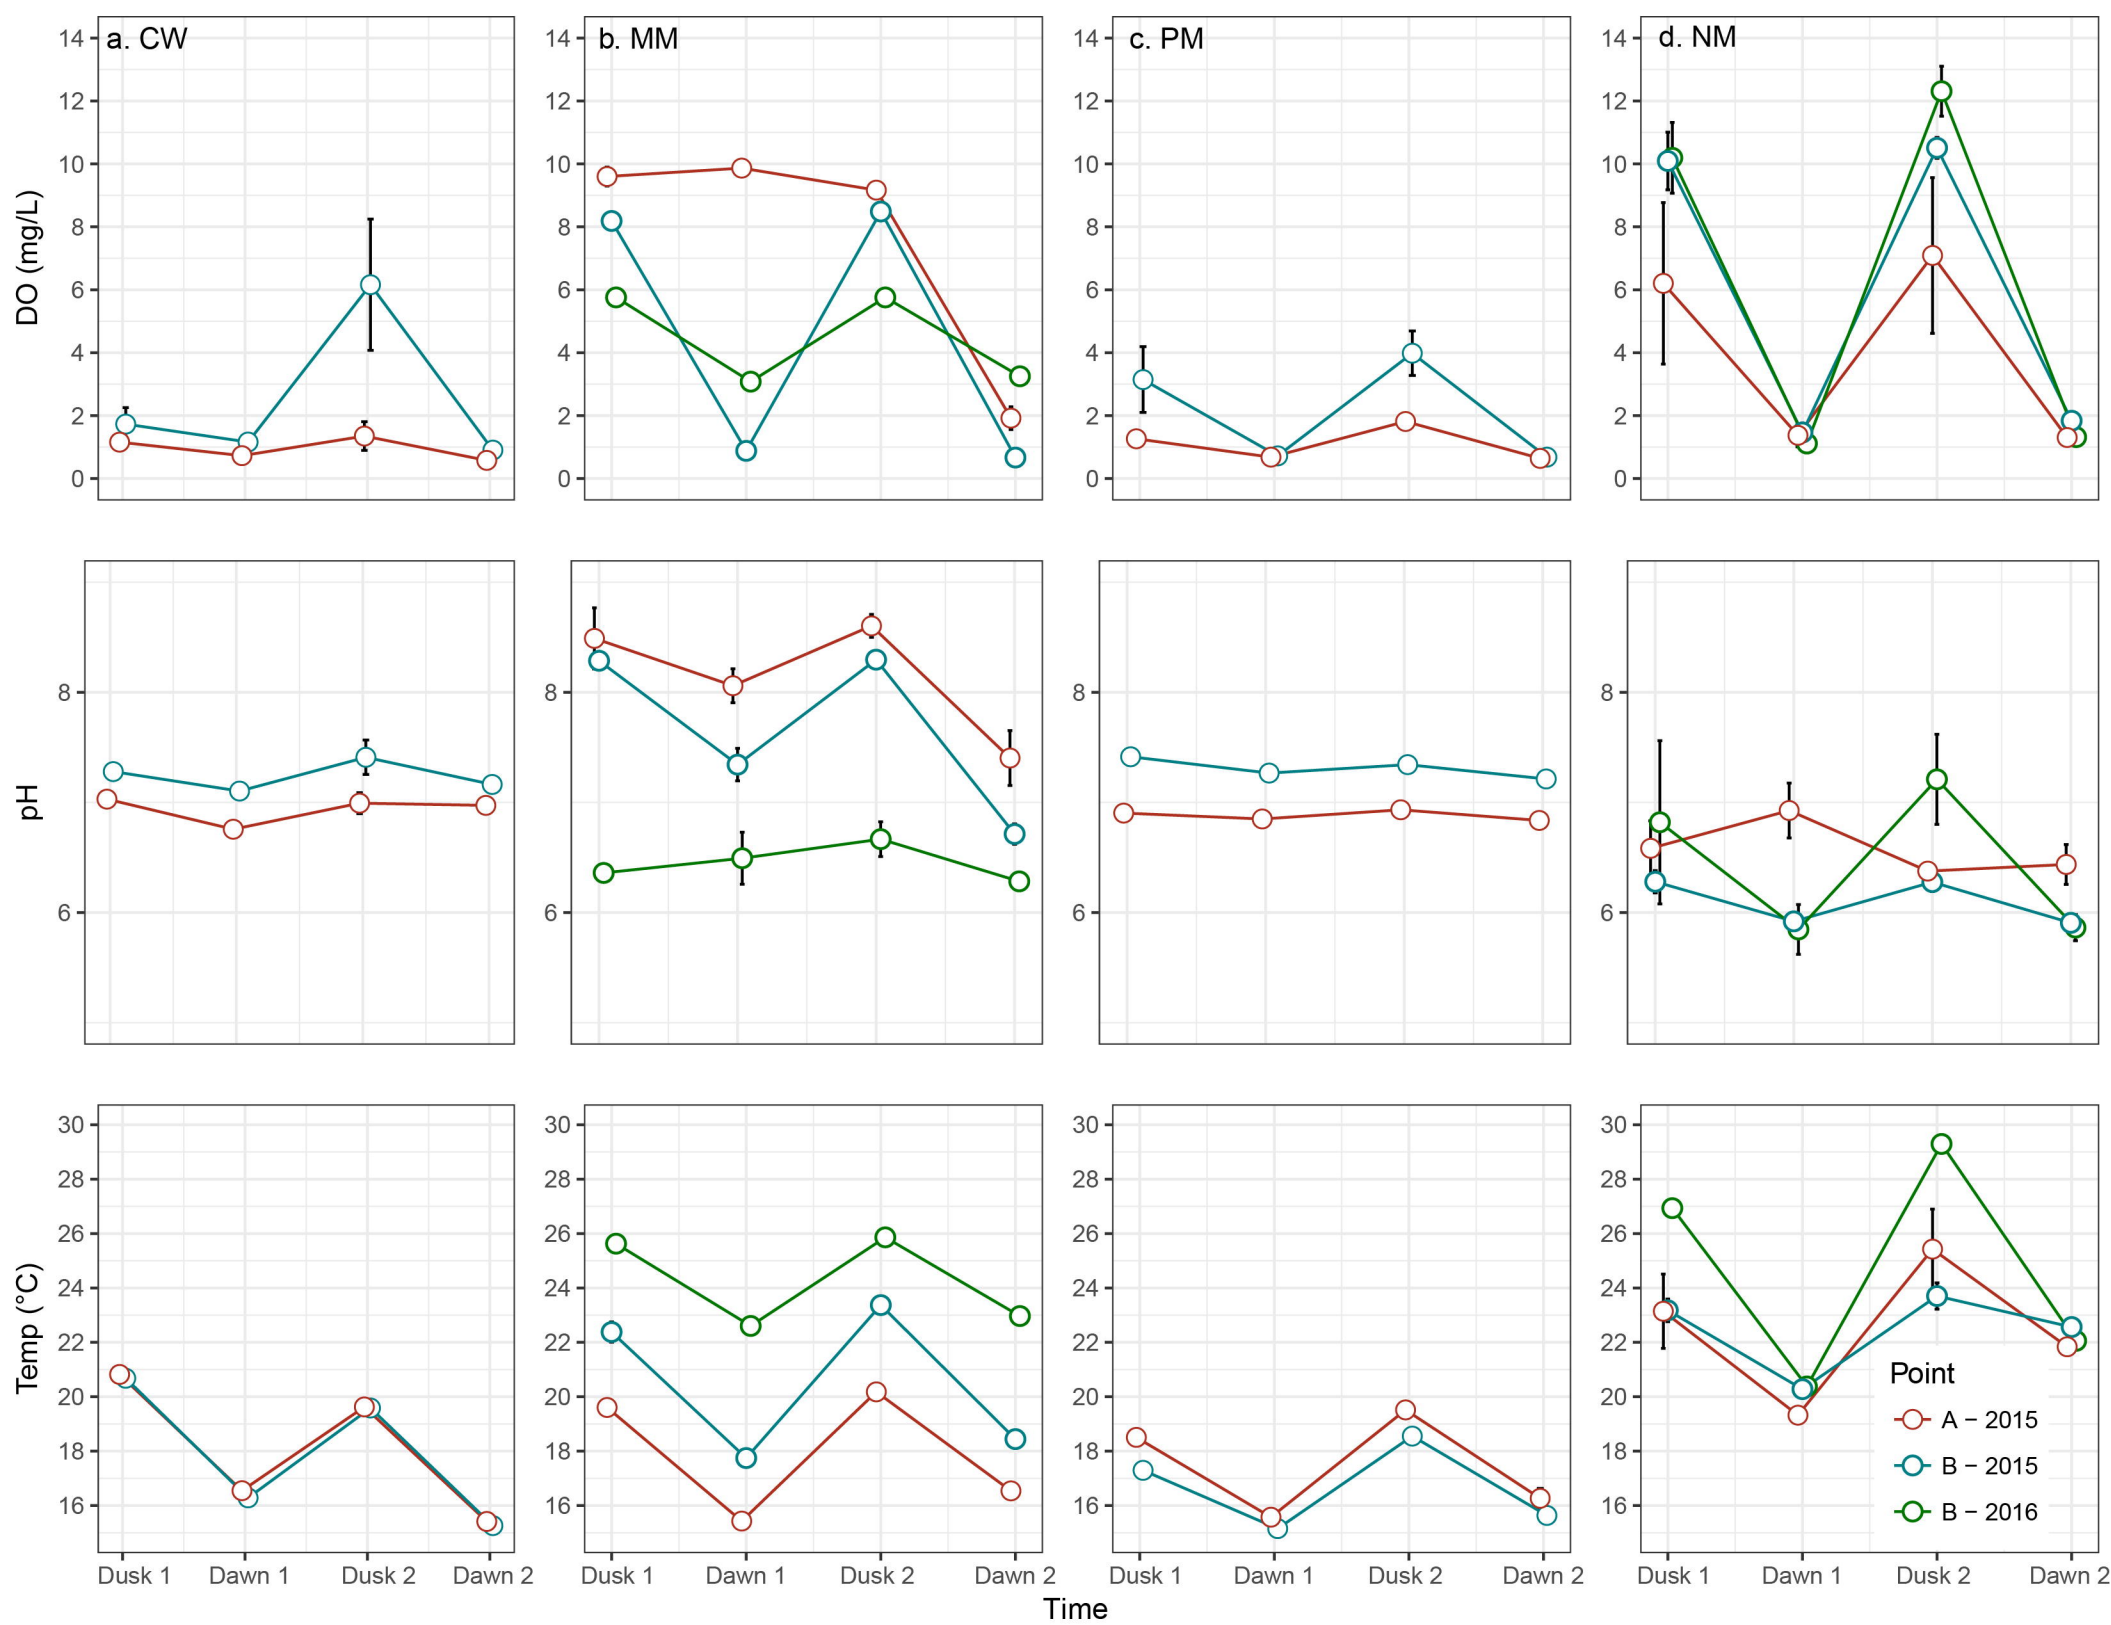

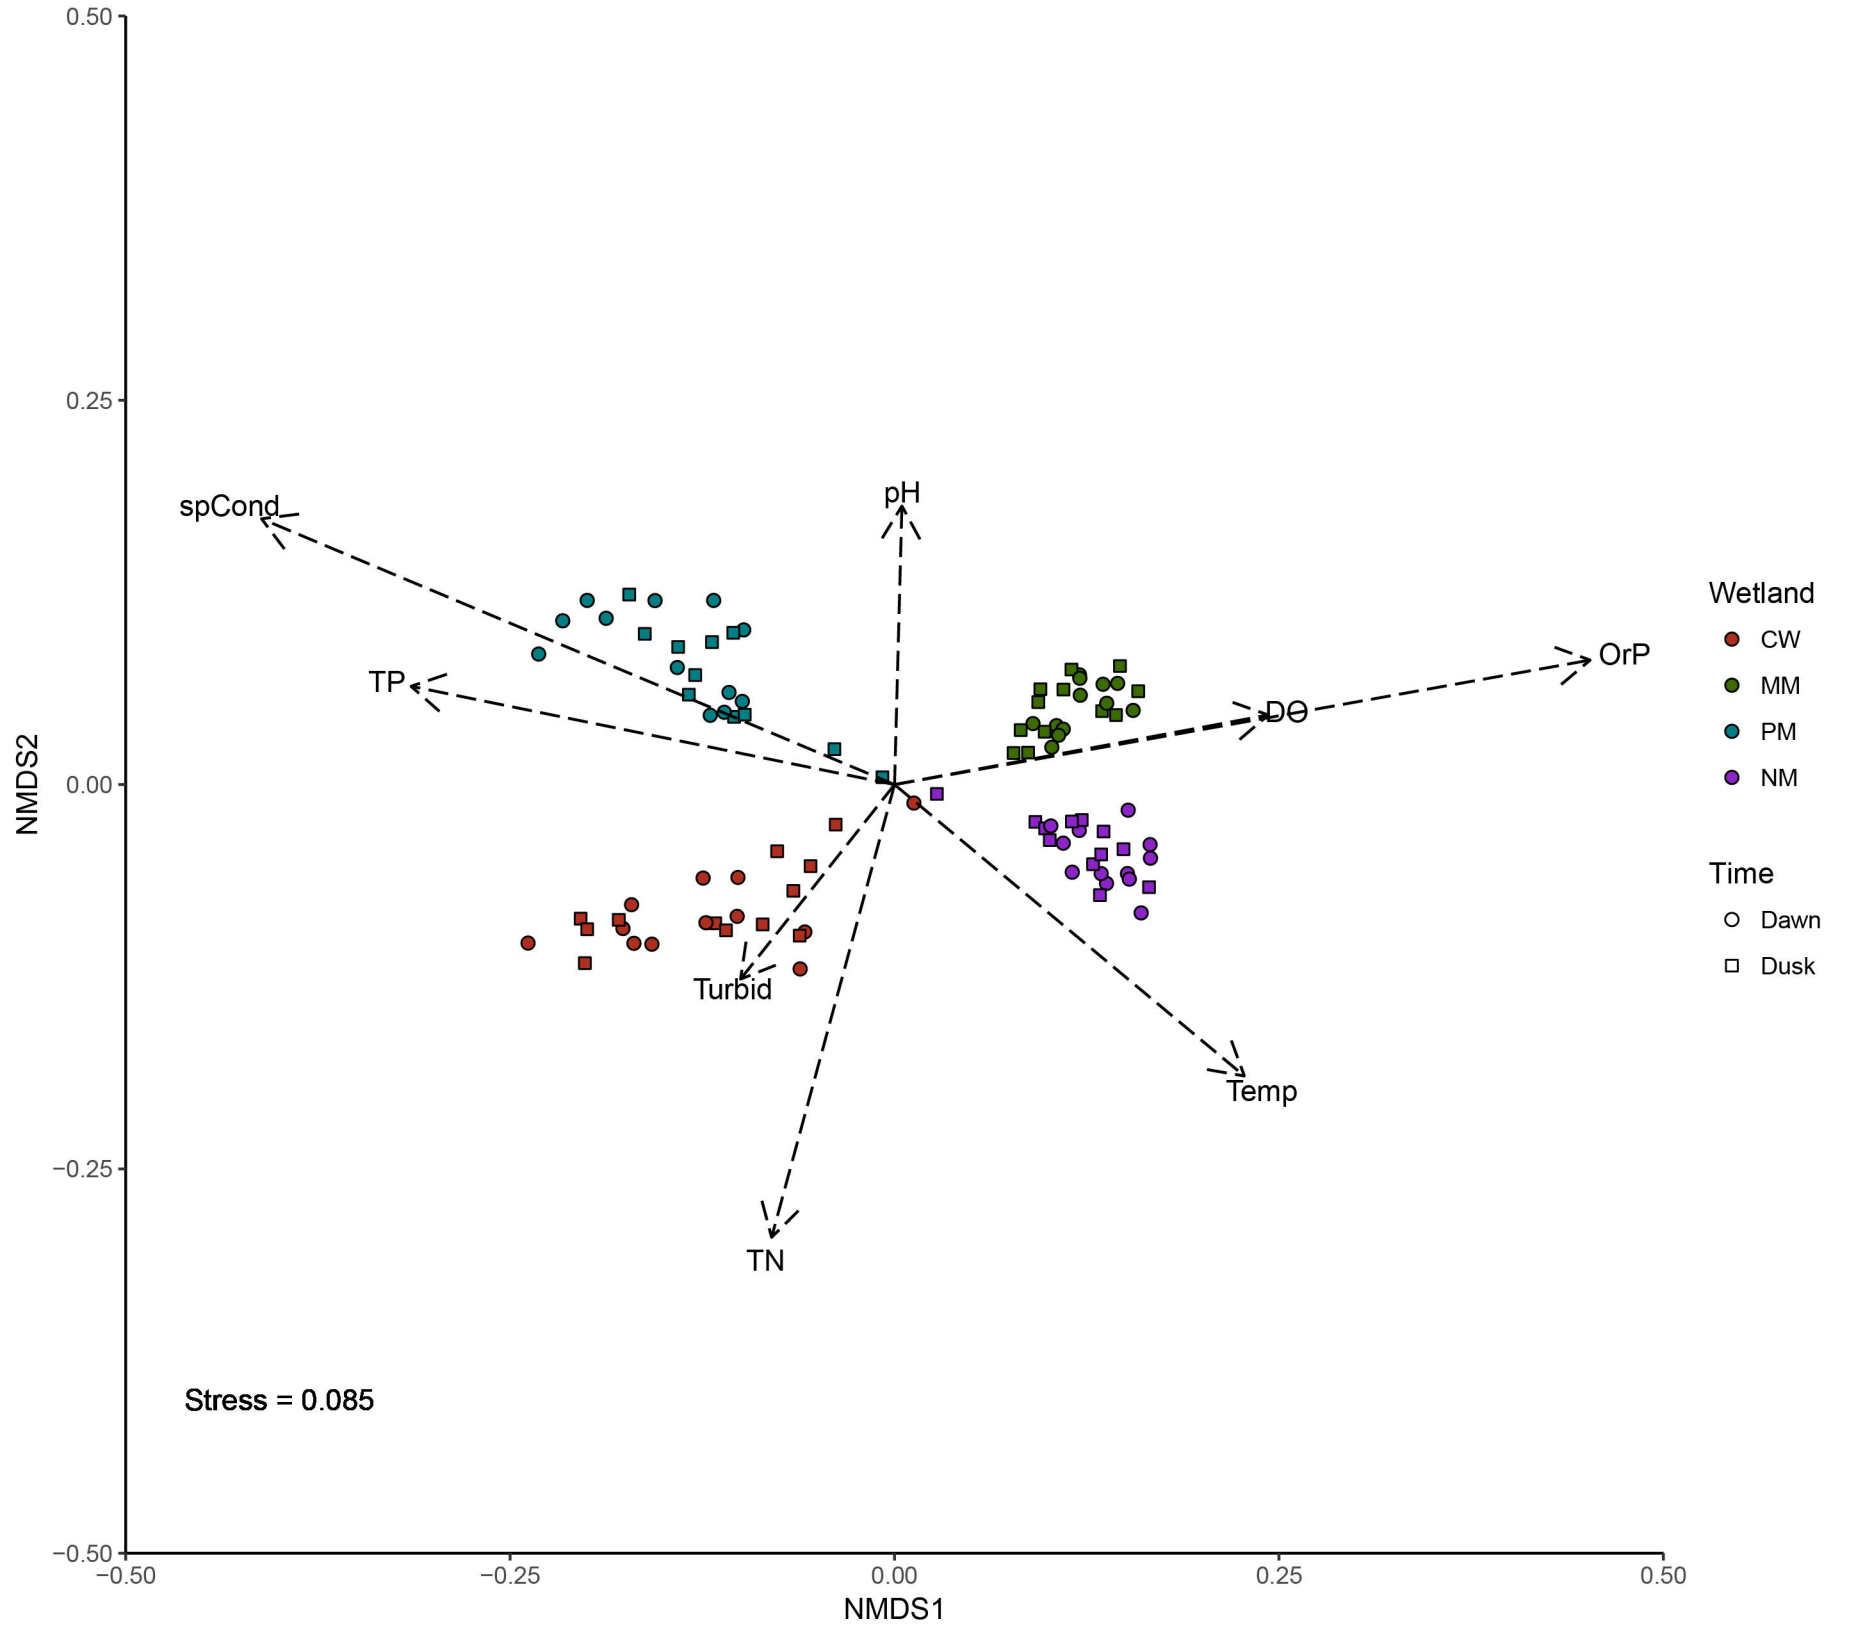

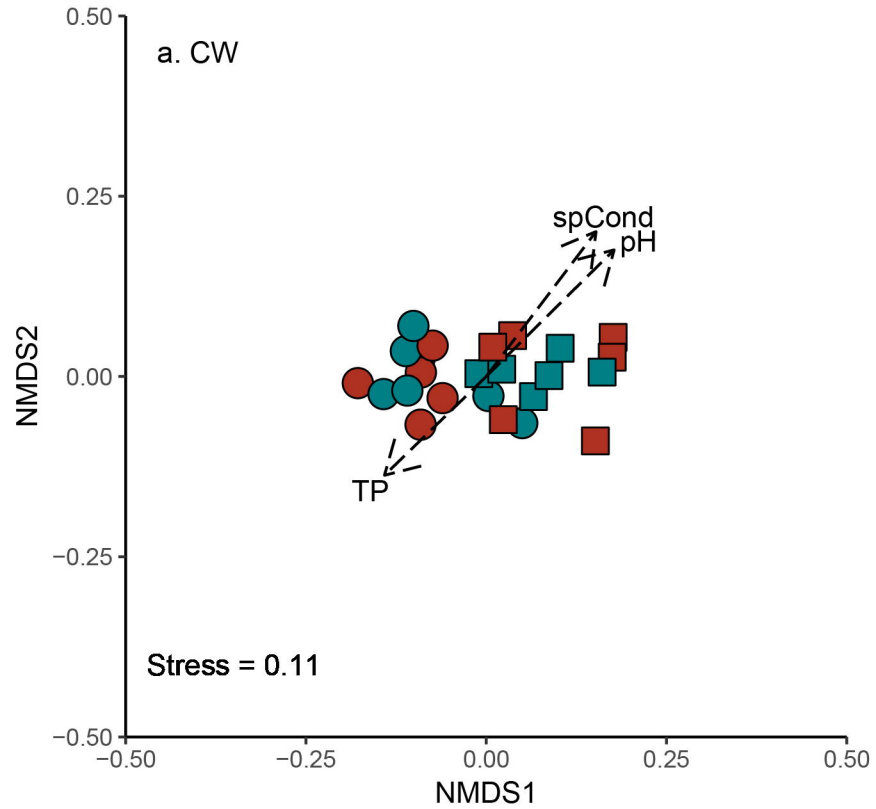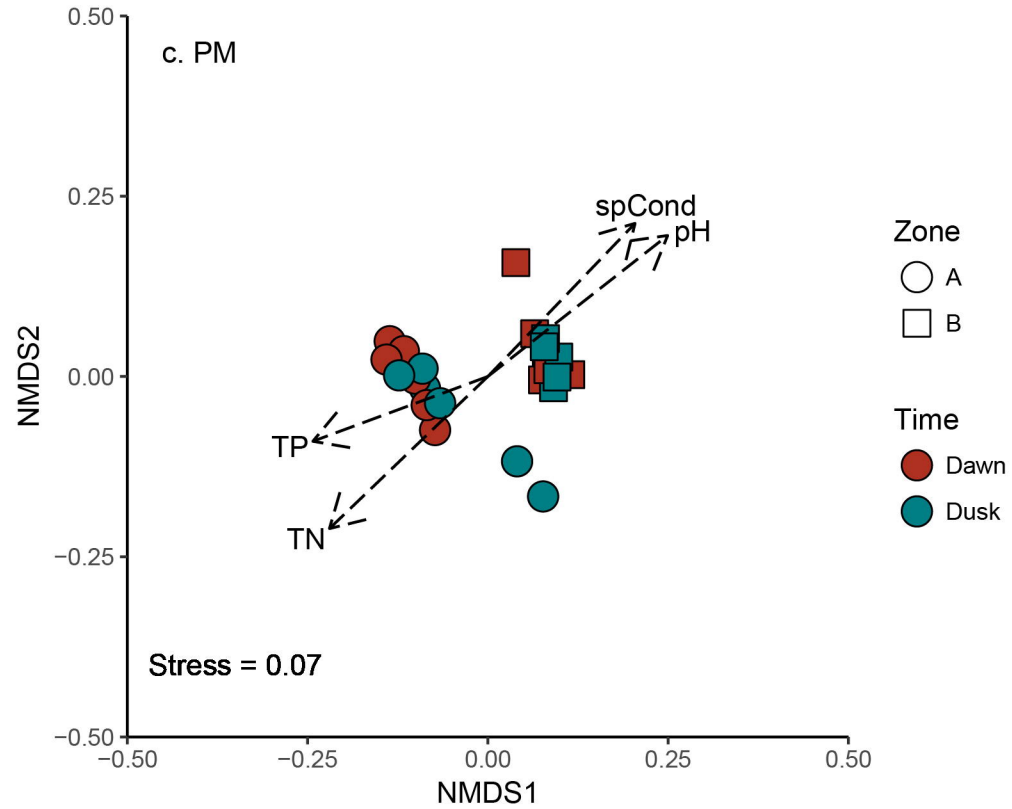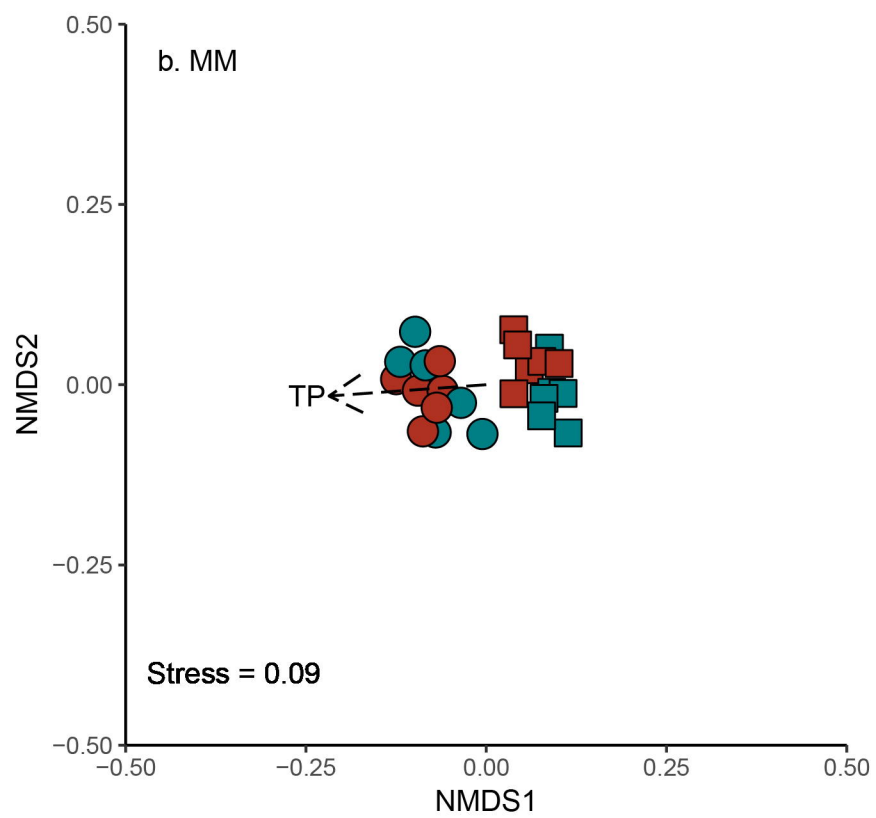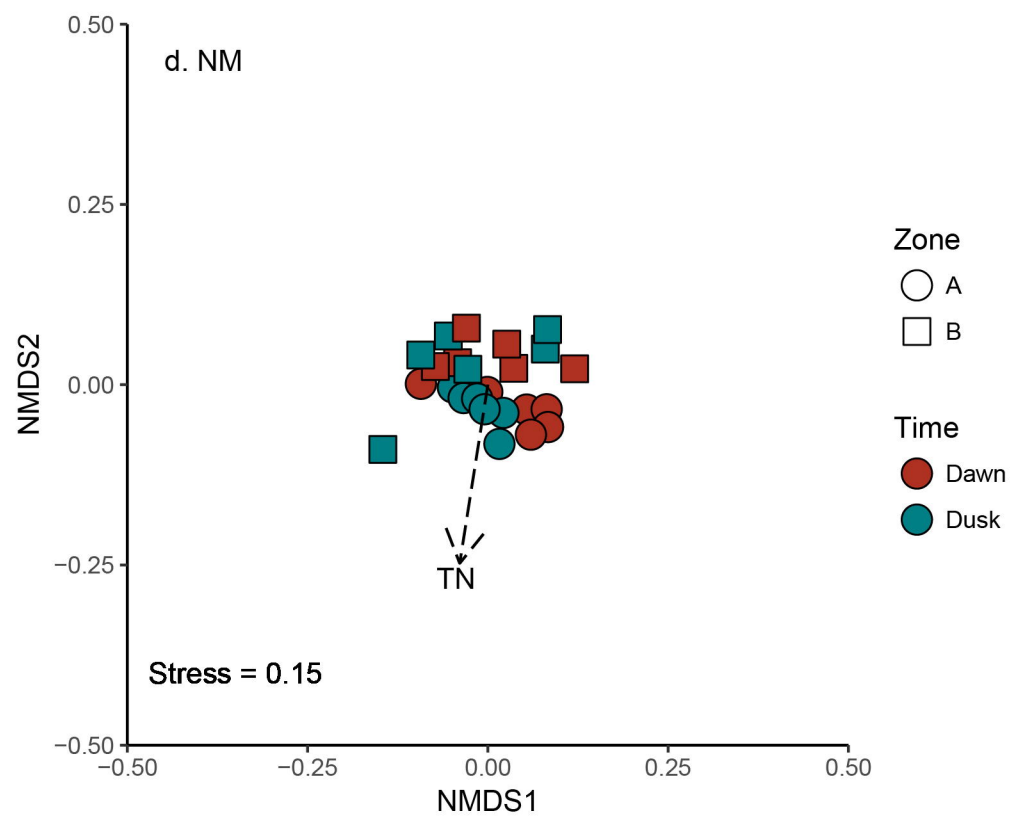

Main Marsh                      North Marsh

---

Dusk                      Dawn                      Dusk                      Dawn

---

1      2      3      1      2      3      1      2      3      1      2      3

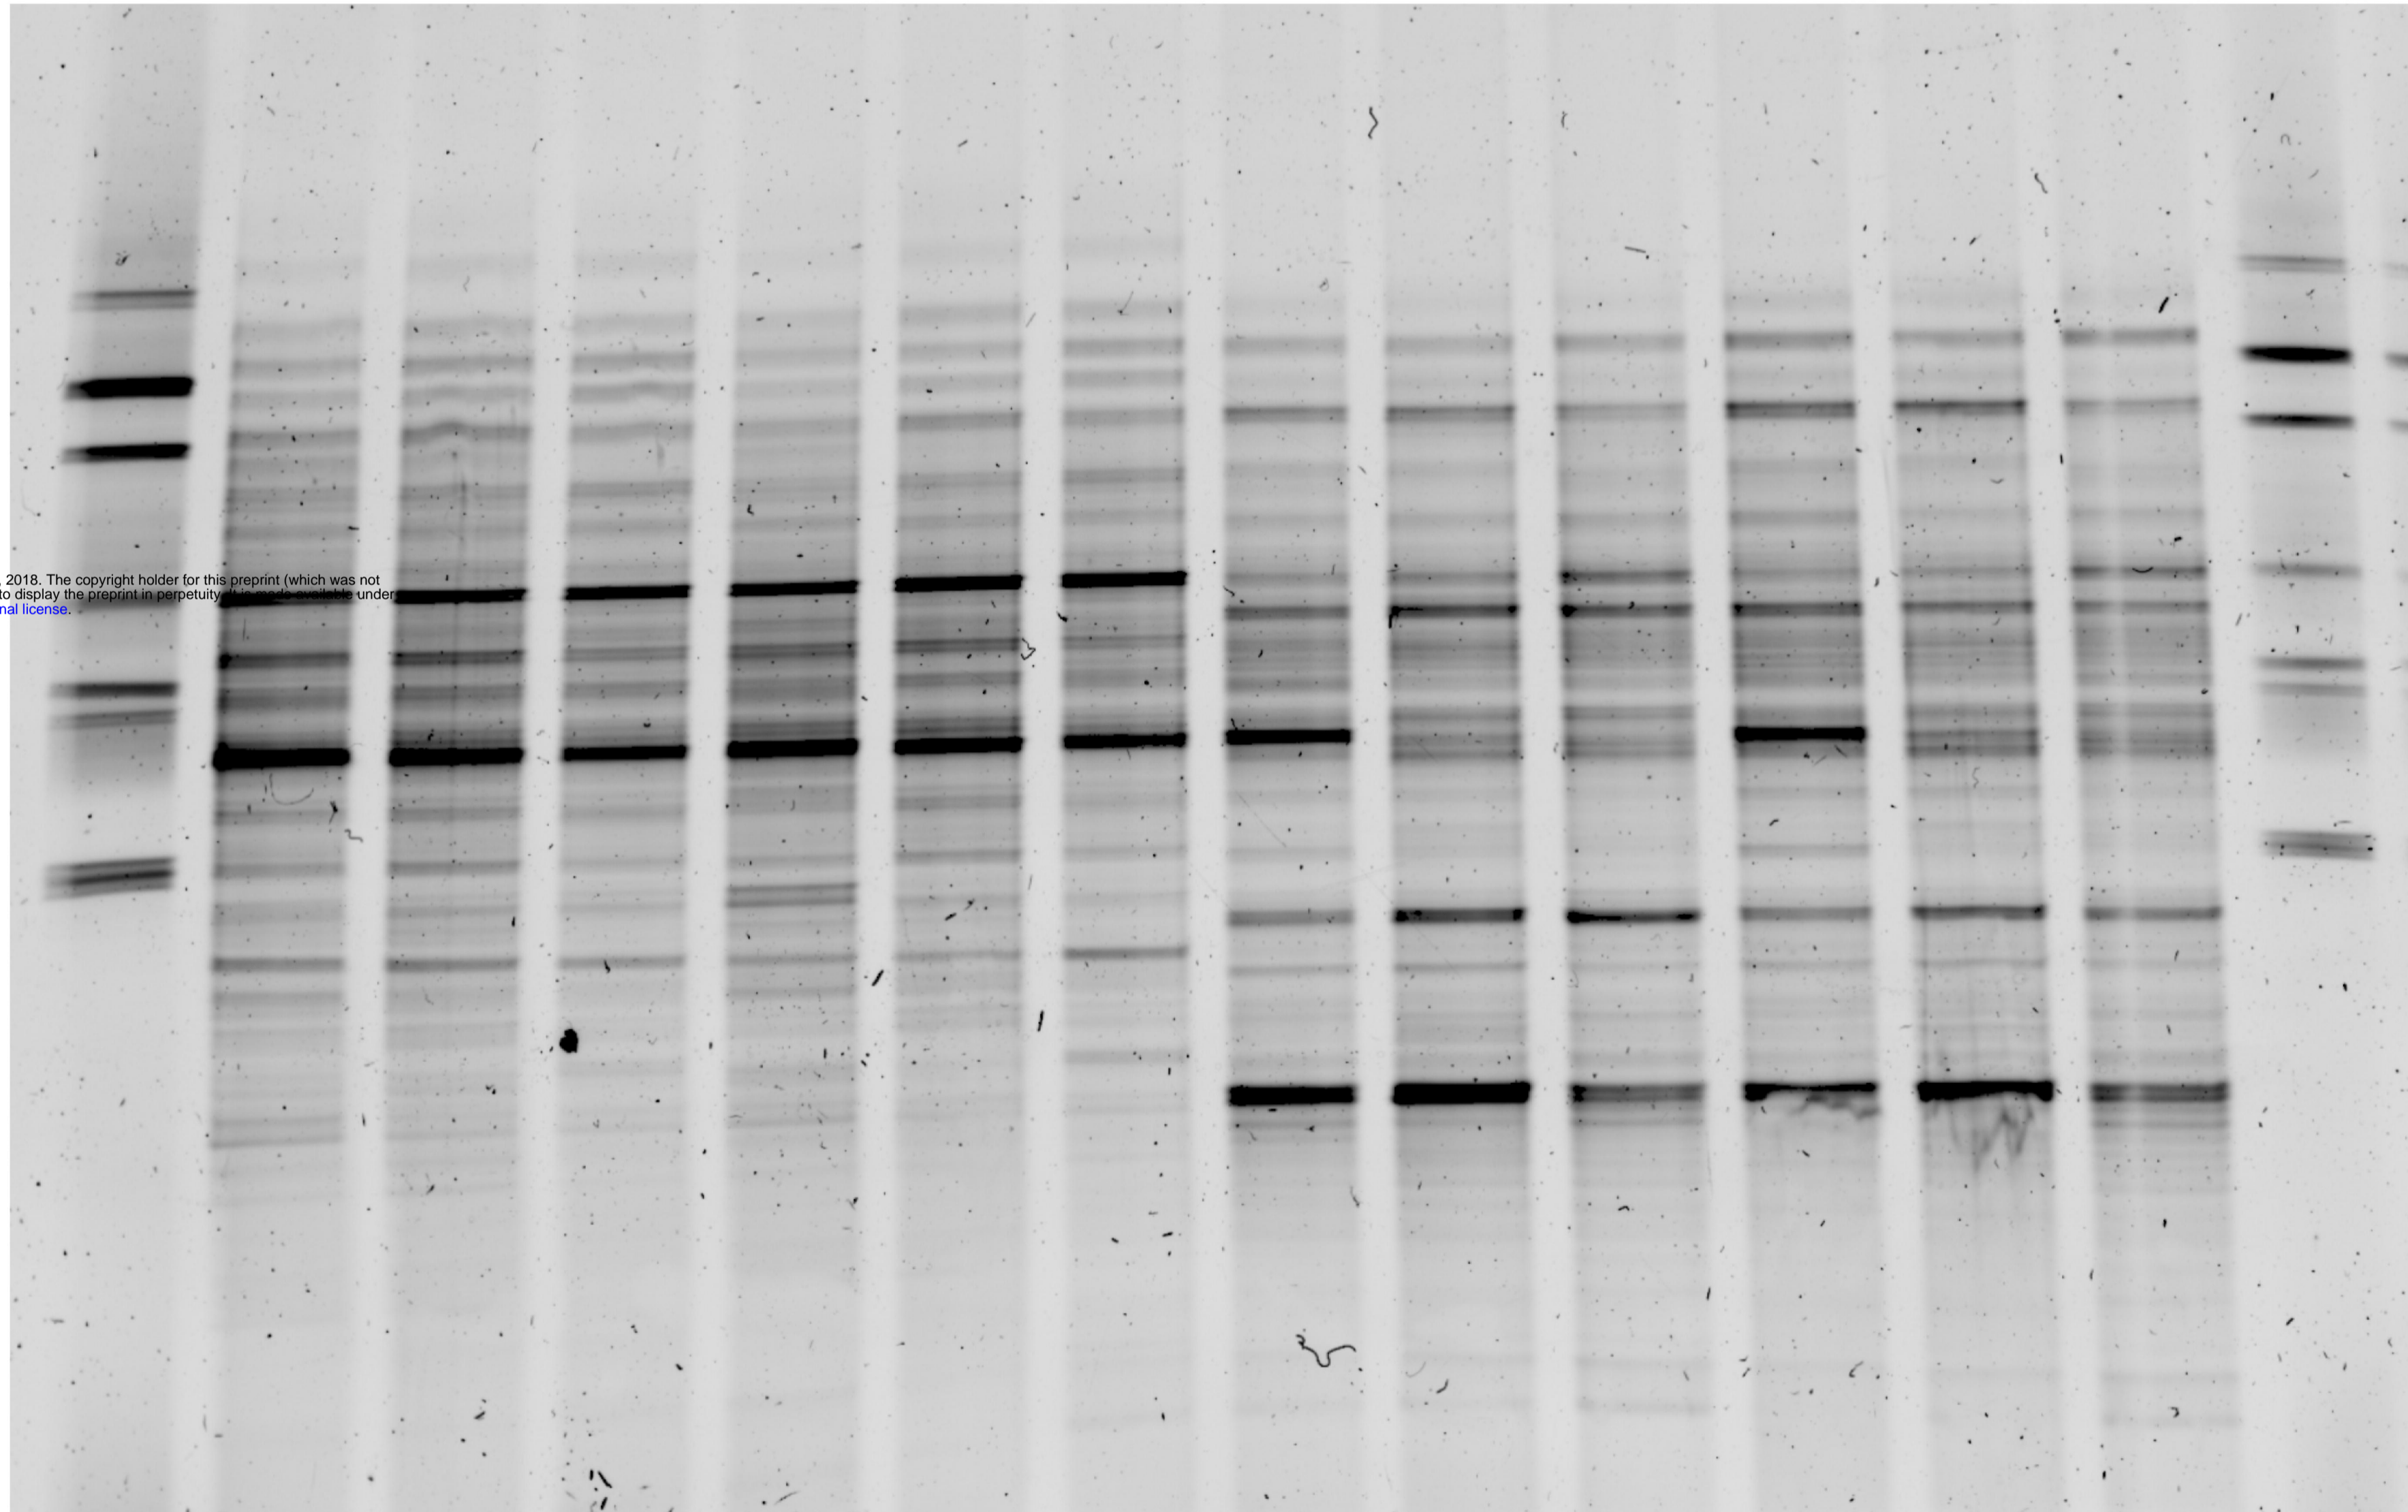

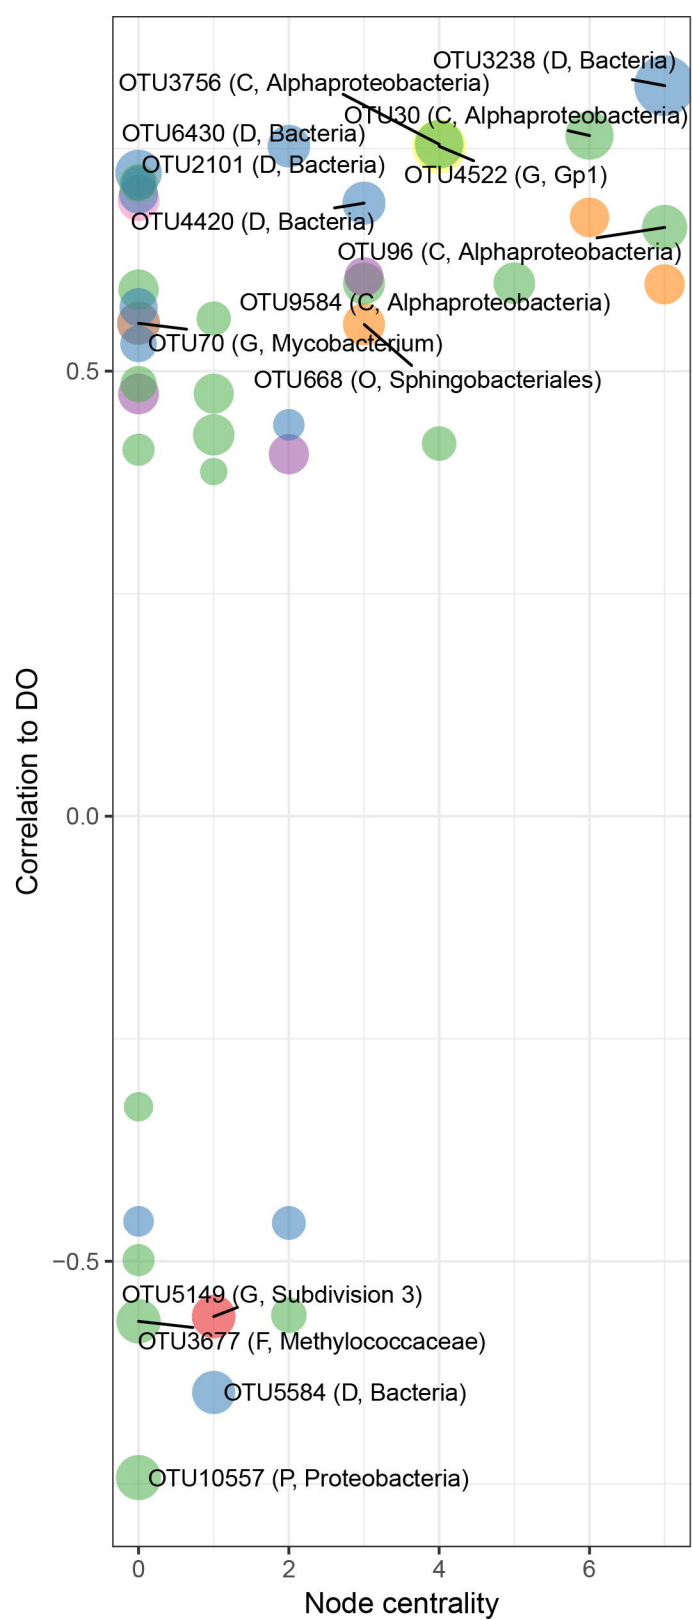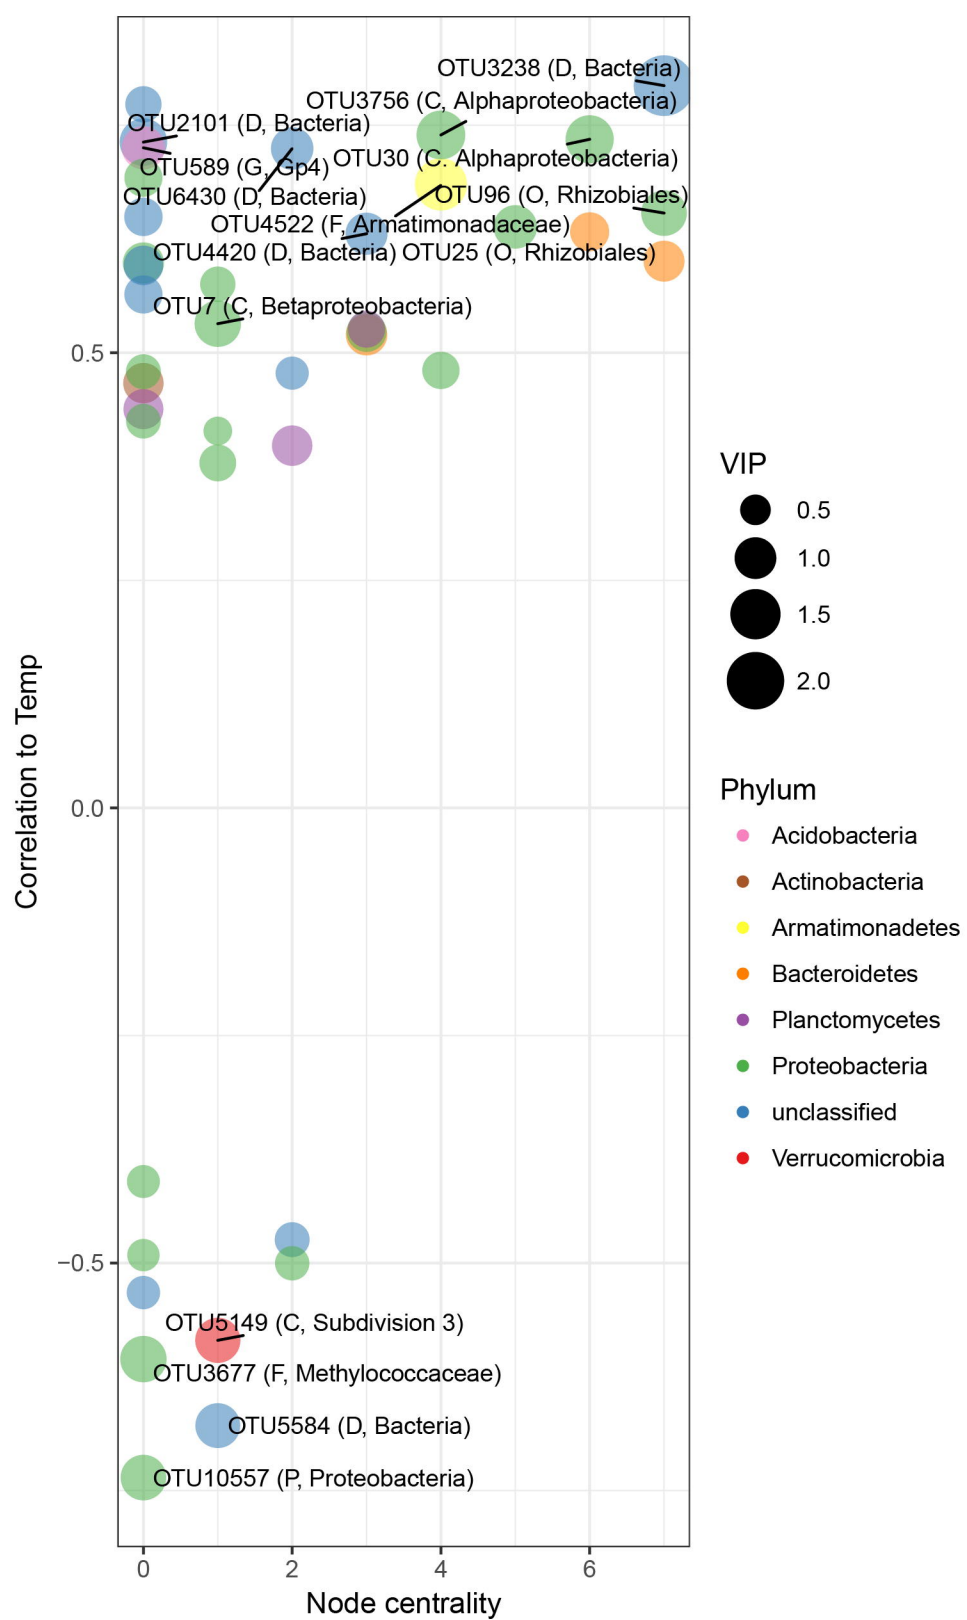

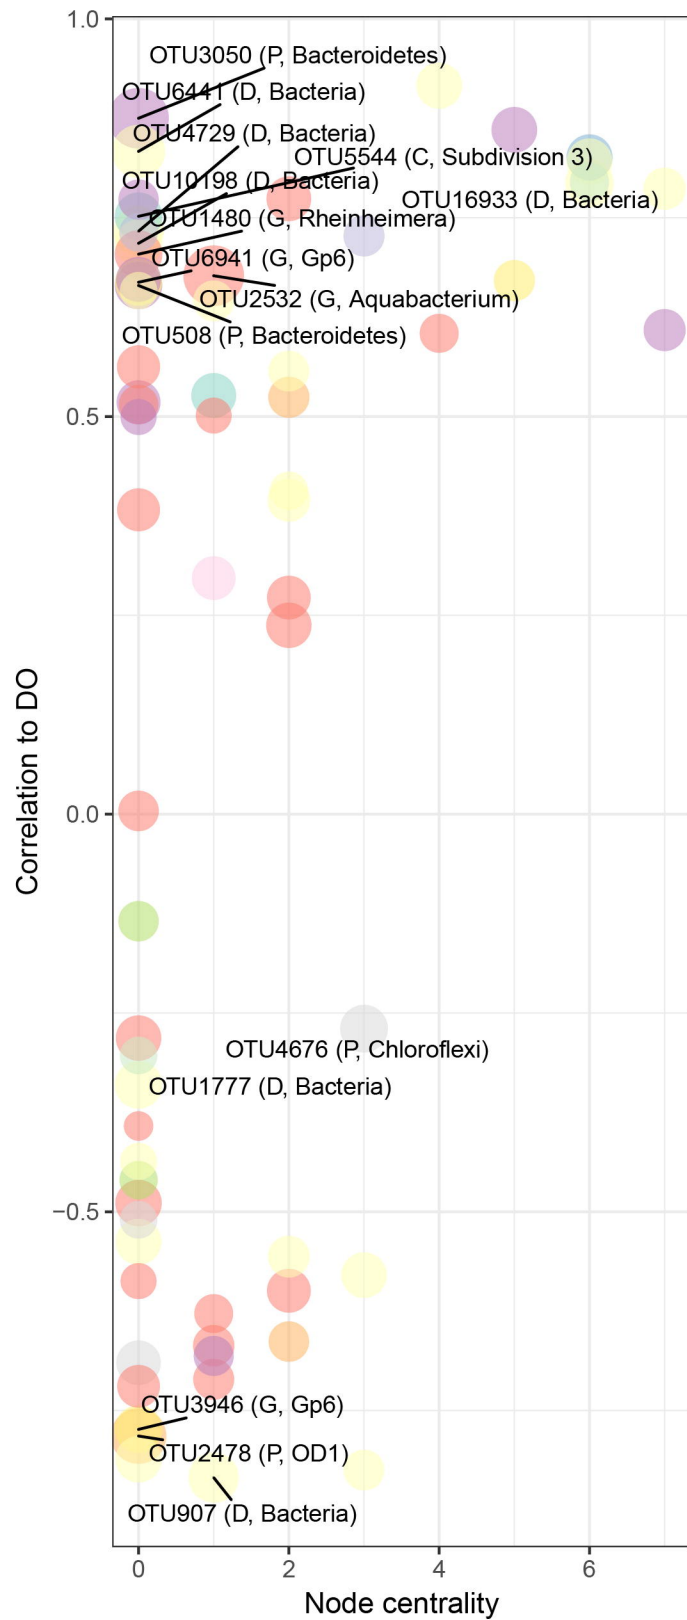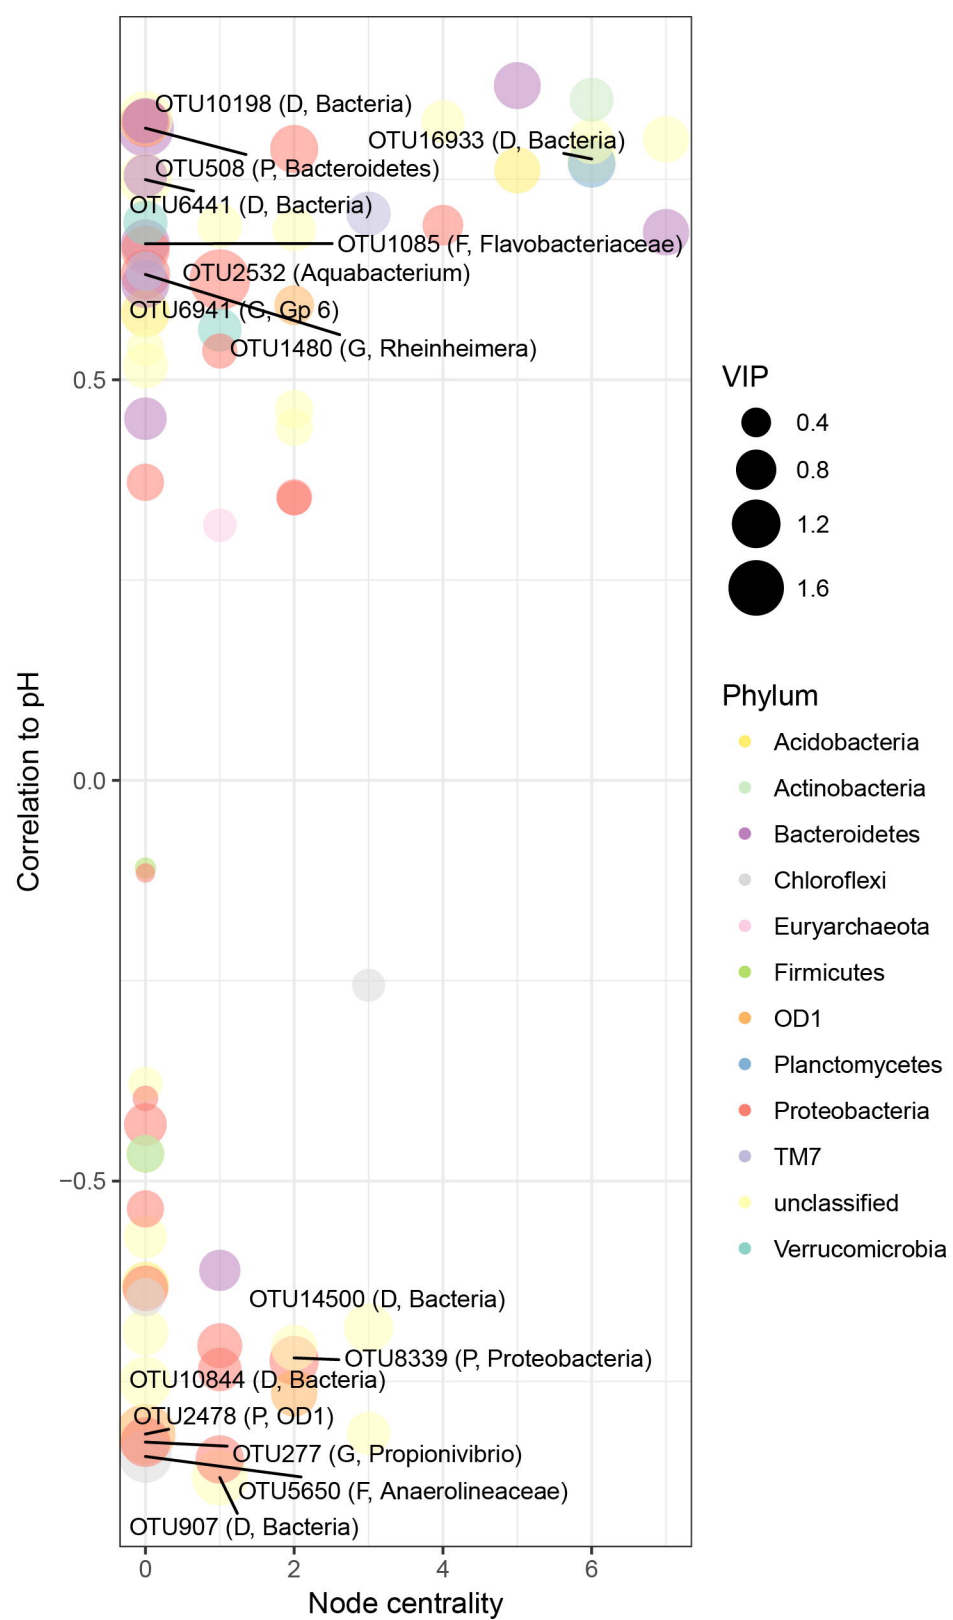

Source: https://www.biorxiv.org/content/10.1101/363226v1.full.pdf
